# Supplementary material
Source: PubMed Central journal article supplement (PMC7510942)
Supplement: NEJMc2026172_appendix.pdf [file NEJMc2026172_appendix.pdf]

## Supplementary Appendix

This appendix has been provided by the authors to give readers additional information about their work.

Supplement to: Joung J, Ladha A, Saito M, et al. Detection of SARS-CoV-2 with SHERLOCK one-pot testing. N Engl J Med. DOI: [10.1056/NEJMc2026172](https://doi.org/10.1056/NEJMc2026172)

# Supplementary Appendix

## Table of Contents

|                                      |    |
|--------------------------------------|----|
| Results                              | 2  |
| Methods                              | 7  |
| STOPCovid.v2 Reagents and Protocol   | 14 |
| Supplementary Figures                | 20 |
| Supplementary Tables                 | 41 |
| Acknowledgements                     | 55 |
| Author contributions                 | 55 |
| Ethical Statement                    | 55 |
| Declaration of conflicts of interest | 55 |
| References                           | 56 |

## Results

Here we describe in more detail the rationale and results that contributed to the development of STOPCovid. We first simplified the viral RNA extraction method. Most clinical labs currently perform an RNA extraction step using commercial RNA extraction kits, which requires multiple fluid handling steps and relies on reagents that have been difficult to obtain steady supplies of. To eliminate this step, we tested various viral lysis buffers for extraction of lentiviral RNA and added the lysate directly into RT-qPCR reactions (Fig. S1A and S1B). We found that addition of DNA QuickExtract to COVID-19 positive patient nasopharyngeal (NP) swab viral transport media (VTM) followed by heating at 95 °C for 5 mins was comparable to the standard QIAmp Viral RNA Miniprep extraction (Fig. S1C).

Integrating the isothermal amplification step with the CRISPR-mediated detection step required developing an optimal common reaction chemistry capable of supporting both steps (Fig. S1D). To amplify the viral RNA, we chose reverse transcription followed by Loop-mediated isothermal amplification (RT-LAMP)<sup>16</sup>. While we have focused on Recombinase polymerase amplification<sup>22</sup> in the past<sup>1,2,5</sup>, LAMP reagents are readily available from multiple commercial suppliers, are easily multiplexed<sup>23</sup>, and rely on defined buffers that are amenable to optimization with Cas enzymes. We designed 29 sets of LAMP primers targeting different regions of the SARS-CoV-2 genome and identified 6 primer sets targeting genes ORF1ab, S, and N that were capable of SARS-CoV-2 RNA detection (Fig. S1E).

LAMP operates at 55-65 °C, requiring a thermostable Cas enzyme for a one-pot chemistry, such as Cas12b from *Alicyclobacillus acidiphilus* (AapCas12b)<sup>17</sup>. The AapCas12b locus does not contain an identifiable CRISPR array, but it can function up to 65 °C with a single guide RNA (sgRNA) based on the direct repeat from *Alicyclobacillus macrosporangiidus* Cas12b (AmCas12b)<sup>17</sup>(Fig. S2A). Replacing the AmCas12b sgRNA with an sgRNA from *Alicyclobacillus acidoterrestris* Cas12b (AacCas12b) (Shmakov et al., 2015), which is highly similar to AapCas12b, produced more robust and specific nuclease activity, possibly due to the stronger hairpin formed near the 3' end of the sgRNA (Fig. S2B and S2C).

We next systematically evaluated all possible spacers targeting our top LAMP amplicons to identify the ideal combination of primers and guide sequence (Fig. S2D). For the top 4 combinations of LAMP primer set and guide, we titrated the concentration of magnesium in a one-pot reaction to find the best combination of buffer, primer set, and guide, yielding an assay targeting gene N (Fig. S2E). For this assay, we found that all 6 LAMP primers and spacer targeting regions were perfectly conserved in at least 99.5% of >31,000 sequenced human SARS-CoV-2 genomes<sup>24</sup>.

Using these conditions, we tested both AapCas12b and AacCas12b in a one-pot reaction. We found that AapCas12b generated faster (34 min to half maximum signal compared to 39 min) and stronger collateral activity (1.6 times maximum signal) than AacCas12b in the one-pot reaction (Fig. S3A). We note that although AacCas12b has been reported to work with LAMP in one-pot assays at 55°C<sup>25</sup>, it did not provide adequate activity in our assay at 60 °C, a temperature more optimally suited for LAMP, possibly because it is unstable at higher temperatures. We further optimized the AapCas12b one-pot reaction by screening 94 additives to improve thermal stability (Fig. S3B), finding that addition of taurine improved reaction kinetics (Fig. S3C and S3D). We termed this optimized one-pot assay STOP and its application for SARS-CoV-2 detection STOPCovid. As expected, STOPCovid detection produces signal only when the target is present, whereas LAMP alone (either as a stand-alone reaction or in the STOPCovid mastermix) can produce nonspecific signal (Fig. S3E), highlighting the additional specificity provided by CRISPR detection.

We used STOPCovid.v1 with a lateral flow readout and SARS-CoV-2 genome standards spiked into pooled healthy saliva or NP swab VTM to determine the sensitivity, robustness, ideal incubation temperature, and readout time of the assay. We found that the STOPCovid.v1 chemistry can detect 100 copies of SARS-CoV-2 per reaction and reproducibly detect 200 copies over 30 replicates (Fig. S4A and S4B). STOPCovid.v1 detection was stochastic below 100 copies per reaction and produced variable signal levels between replicates, potentially resulting from variability in the timing of LAMP (Fig. S4A and S4B). The ideal incubation parameters were 60 °C for at least 50 minutes for lateral flow, though longer incubation times do not affect the results (Fig. S4C and S4D). The reaction components could be formulated as a mastermix, which maintained functionality after 6 freeze-thaw cycles (Fig. S4E). The assay exhibited no cross-reactivity with the SARS-CoV or MERS-CoV genomes (Fig. S4F) and could be performed using either a standard heat block or via a water bath maintained by a commercially-available low-cost (under \$40USD) sous-vide cooker (Fig. S4G and S4H).

In addition to lateral flow readout, STOPCovid.v1 is also compatible with fluorescence readout, which allows for simultaneous detection of an internal control using orthogonal fluorescent dyes. By introducing LAMP primer sets targeting an abundant control gene into the STOPCovid reaction, LAMP amplification signal detected by SYTO 9 nucleic acid stain before 28 minutes indicates specific amplification of human sample, while Cas12b collateral cleavage of a HEX reporter probe indicates presence of SARS-CoV-2. We screened 114 LAMP primer sets targeting *ACTB* and *GAPDH* to identify 19 LAMP primer sets that could be multiplexed with the N LAMP primer set at 50% or 20% of the total primer set concentration (Fig. S5). The best control LAMP primer set, *ACTB* Set 1, could be multiplexed with the N gene LAMP primer set at 20% of the total primer amount (Fig. S5). Using SARS-CoV-2 genome standards spiked into pooled healthy saliva or NP swabs, we determined the multiplex reaction is sensitive down to 200 copies of SARS-CoV-2 genome per reaction (Fig. S6A through S6D). Our assay detected

30/30 replicates at 300 genomic copies and 27/30 replicates at 200 genomic copies (Fig. S6E and S6F). Similar to lateral flow, the fluorescent multiplexed assay was most robust at 60°C (Fig. S6G and S6H).

We then evaluated STOPCovid.v1 with lateral flow readout on 43 SARS-CoV-2 RNA positive (Ct values ranging from 17 to 38) and 15 negative patient NP swab VTM samples. STOPCovid.v1 had a sensitivity of 84% and specificity of 100% for detecting 2 out of 3 replicates for the 43 positive samples (Fig. S7A through S7C). Samples that tested false negative with STOPCovid.v1 had RT-qPCR Ct values above 32 (Fig. S7A). Parallel work from the Virology Lab at the University of Washington on 19 positive and 7 negative patient samples showed that STOPCovid.v1 had a sensitivity of 84% and specificity of 100% (Fig. S7D). Patient sample dilution series revealed that STOPCovid.v1 sensitivity comparable to RT-qPCR Ct value of 30.8 (Fig. S7E). In addition, we found that lysis at a lower temperature (60°C or 22°C) is a viable alternative for streamlining the STOPCovid.v1 assay workflow, albeit with a slight decrease in sensitivity (increased Ct value of 0.8/0.2 at 60 °C and 1.1/0.9 for 22 °C for CDC N1/N2 probe sets) (Fig. S8A through S8C). Together, these results demonstrate the feasibility of detecting SARS-CoV-2 without RNA extraction in a one-pot reaction, but based on the distribution of Ct values for 2,105 SARS-CoV-2 positive patients (Fig. S8D), STOPCovid.v1 would only capture 60.5 % of RT-qPCR-positive patients.

We therefore sought to boost sensitivity by increasing sample input via sample concentration. In our initial attempt to simplify viral RNA extraction, we only used 2.5 µL of the 3 mL NP swab VTM (0.083 % of the total NP swab sample). We reasoned that capturing all of the viral RNA from an NP or anterior nasal (AN) swab would increase sample input by 1,200-fold and dramatically increase sensitivity. We tested sample concentration using two magnetic bead formulations, laboratory-developed<sup>26</sup> and commercial (Beckman SPRIselect), prior to STOPCovid detection. We found that both formulations could efficiently capture viral RNA (SARS-CoV-2 genomic standards spiked into DNA QuickExtract lysis buffer with human background RNA) into one 50 µL STOPCovid reaction using the standard magnetic bead purification method (Fig. S9A). In addition, we determined we could elute the sample from the beads by directly adding STOPCovid mastermix to the magnetic beads without a separate water elution step (Fig. S9A). As the laboratory-developed magnetic beads are significantly cheaper (\$0.20USD/reaction compared to \$6.13USD/reaction) and easier to modify than the commercial version, we moved forward with the laboratory-developed magnetic beads. We found that introducing the bead concentration step increased sensitivity, enabling detection of as little as 100 viral copies per sample compared to 5,000 copies per sample without this step (Fig. S9B).

To streamline the magnetic bead concentration workflow, we eliminated the ethanol wash step and combined the lysis and magnetic bead binding steps by optimizing the salt concentration of the one-pot reaction and testing alternative QuickExtract formulations (Fig. S9C through S9E).

Using SARS-CoV-2 virus-like particles (SARS-CoV-2 RNA targets in a noninfectious viral coat), we found that Plant QuickExtract combined with magnetic bead binding in a KCl buffer produced the best results in lieu of any washing steps, further simplifying extraction to a total of 15 minutes with minimal hands on time (Fig. S9E). We refer to this streamlined workflow as STOPCovid.v2 (Fig. 1A).

We further optimized the STOPCovid.v2 chemistry by titrating Cas12b and sgRNA concentrations. While characterizing STOPCovid.v2, we noticed that STOPCovid.v2 occasionally produced false positive results. We hypothesized that this was due to partial overlap between the sgRNA and LAMP BIP primer that contributed to sporadic Cas12b collateral activity. We therefore titrated Cas12b and sgRNA concentrations and found that the optimal concentration of Cas12b and sgRNA for reducing the proportion of false positive results while retaining true positive signal was 31.3 nM (Fig. S10A). We verified that this concentration of Cas12b and sgRNA maintained the same sensitivity (Fig. S10B).

We compared STOPCovid.v2 to the standard CDC workflow that uses QIAmp Viral RNA Miniprep extraction followed by RT-qPCR (Fig. S10C). Starting with different concentrations of SARS-CoV-2 virus-like particles, we performed a direct comparison of the two assay workflows. We confirmed that the CDC SARS-CoV-2 RT-qPCR protocol could reliably detect down to 1,000 copies per mL of VTM, the reported limit of detection (LOD) of the assay (<https://www.fda.gov/media/134922/download>). By contrast, STOPCovid.v2 was able to reliably detect viral loads as low as 100 copies per sample (equivalent to 33 copies per mL VTM) for the fluorescence readout and 250 copies (equivalent to 83 copies per mL VTM) for the lateral flow readout. We typically detect positive signal in less than 45 minutes by fluorescence read out and 80 minutes by lateral flow. Introduction of the magnetic bead concentration step in STOPCovid.v2 allowed for detecting viral RNA from the entire swab sample, or 600-fold higher input, than the CDC RT-qPCR workflow. As a result, STOPCovid.v2 could reliably detect 30-fold lower viral load than the CDC RT-qPCR workflow (100 copies per sample, or 33 copies per mL, compared to 1,000 copies per mL). These results suggest that though the STOPCovid.v2 reaction is 20 times less sensitive than the RT-qPCR reaction itself (detects 100 copies per reaction compared to 5 copies per reaction), adding an initial sample concentration in the STOPCovid.v2 workflow resulted in higher overall sensitivity.

We evaluated the performance of the optimized STOPCovid.v2 chemistry on SARS-CoV-2 positive patient samples. Patient NP swab sample dilution series revealed that STOPCovid.v2 had a limit of detection comparable to an RT-qPCR Ct value of 40.3, which could in theory capture 99.7% of SARS-CoV-2 positive patients (Fig. S8D, S10D, and S10E). Blinded testing by an external laboratory at the University of Washington on 202 SARS-CoV-2 positive and 200 negative patient NP swab VTM samples showed that the sensitivity and specificity of STOPCovid.v2 were 93.1% and 98.5% respectively (Fig. 1B and 1C, Fig. S11A, and Table 1).

STOPCovid.v2 false negative samples had RT-qPCR Ct values that were greater than 37. Positive samples were detected in 15-45 mins. Finally, we validated STOPCovid.v2 using dry AN swabs. We confirmed that STOPCovid.v2 could detect SARS-CoV-2 virus-like particles spiked into SARS-CoV-2 negative dry AN swabs (Fig. S11B and S11C). STOPCovid.v2 correctly identified 5 SARS-CoV-2 positive patient AN swabs (Ct values ranging from 19 to 36) (Fig. S11D and S11E).

To aid users of STOPCovid, we have developed a mobile phone application to help the user interpret lateral flow results (Fig. S10C and S12). We note that lateral flow testing requires opening post-amplification tubes, and users should consider separate pre- and post-amplification workspaces to reduce chances of cross contamination between samples and false positives.

## Methods

### *RT-qPCR reactions*

RT-qPCR reactions were performed using the TaqPath 1-Step RT-qPCR Master Mix (ThermoFisher A15300) using TaqMan probes and primer sets (Table S1) and measured on a Roche LightCycler 480. RT-qPCR quantification was performed using the second derivative maximum method from the LightCycler software.

### *Viral nucleic acid extraction*

To compare crude lysis methods with standard RNA extraction methods, viral samples were purified using the QIAamp Viral RNA Mini Kit (Qiagen 52906), using 100  $\mu$ L sample input and 100  $\mu$ L elution volume.

### *Lentiviral lysis and quantification*

To evaluate crude lysis methods, red fluorescent protein sequence packaged into lentivirus as described previously<sup>29</sup> was directly used for downstream quantification or diluted 1:1 in candidate lysis buffers and boiled at 95 °C for 5 minutes. Lysis efficiency was determined using 2  $\mu$ L of crude sample as input into a 20  $\mu$ L RT-qPCR reaction, performed as described above.

### *Mock clinical sample preparation*

Nasopharyngeal (NP) swabs from healthy donors (Lee Biosolutions 991-31-NC) were dipped in 2 mL E-MEM (VWR 10128-214) to dislodge material from the swab. NP swabs from 5 patients were pooled to simulate SARS-CoV-2-negative NP swab matrix. Saliva from 5 healthy donors (Lee Biosolution 991-05-S) was pooled together to simulate SARS-CoV-2 negative saliva matrix. Clinical matrices were heated at 95 °C for 5 minutes with an equal volume of QuickExtract DNA Extraction Solution (Lucigen QE09050), followed by the addition of SARS-CoV-2 genomic standards (Twist Biosciences 102019) at indicated concentrations to create mock clinical samples for downstream detection.

### *Loop-mediated Isothermal Amplification (LAMP)*

LAMP primer sets (Table S2) were designed using LAMP Designer 1.16 (Premier Biosoft) or GLAPD<sup>30</sup>. LAMP reactions were performed using final concentrations of 1.6  $\mu$ M FIP/BIP primers, 0.2  $\mu$ M F3/B3 primers, and 0.4  $\mu$ M LoopF/B primers. LAMP primer sets were screened using the WarmStart Lamp Kit (New England Biolabs E1700) with 1X fluorescent LAMP dye and 25 ng of background human RNA in 20  $\mu$ L reactions. RNA targets for LAMP primer screening (Table S2) were transcribed using HiScribe T7 Quick High Yield RNA Synthesis Kit (New England Biolabs E2050). Optimizations of LAMP primer sets selected for further evaluation were performed using 1X Isothermal Amplification Buffer (20 mM Tris-HCl, 50 mM KCl, 10 mM (NH<sub>4</sub>)<sub>2</sub>SO<sub>4</sub>, 2 mM MgSO<sub>4</sub>, 0.1% Tween 20, pH 8.8) (New England Biolabs B0537), 1.4 mM dNTPs (New England Biolabs N0447), 6.4 units of Bst2.0 WarmStart DNA



Polymerase (New England Biolabs M0538), 6 units of WarmStart RTx Reverse Transcriptase (New England Biolabs M0380), variable concentrations of added MgSO<sub>4</sub> (New England Biolabs B1003) and 1X fluorescent LAMP dye in 20 µL reactions containing 10% mock NP clinical sample with SARS-CoV-2 genomic standards. LAMP reactions were performed at 60 °C (unless otherwise indicated) for 1-2 hrs on a qPCR machine (Roche LightCycler 480 or BioRad CFX) with fluorescent measurements every 2 minutes.

### *Cas12b Protein Purification*

AacCas12b and AapCas12b orthologs were expressed and purified with a modified protocol<sup>31</sup>. Briefly, AacCas12b (human codon optimized) bacterial expression vector was transformed into BL21-CodonPlus (DE3)-RIPL Competent Cells (Agilent 230280), and AapCas12b bacterial expression vector was transformed into BL21(DE3) Competent E. coli (NEB C2527). Protein sequences for AacCas12b and AapCas12b are listed in Table S3. A 12.5 mL starter culture was grown in Terrific Broth media (TB) supplemented with 100 µg/ml ampicillin for 12 h, which was used to inoculate 12 L of TB for growth at 37°C and 150 rpm until an OD<sub>600</sub> of 0.4. After cells were cooled down to 16°C, protein expression was induced by supplementation with IPTG (Goldbio I2481C) to a final concentration of 0.5 mM. The cells were incubated at 16°C for 16 h for protein expression, and then harvested by centrifugation for 20 min at 4°C at 4000 rpm (Beckman Coulter Avanti J-E, rotor JLA9.100). Cell pellet was stored at -80°C for later purification. All subsequent steps were performed at 4°C. Cell pellet was resuspended in 600 mL of lysis buffer (20 mM Tris-HCl, 500 mM NaCl, 1 mM DTT, pH 8.0) supplemented with cOmplete ULTRA Tablets (Millipore sigma 6538282001), 1 mg/mL lysozyme (Sigma L6876), and 250 units/L benzonase (Sigma E1014). Cells were disrupted by the LM20 Microfluidizer system at 18,000 PSI. Lysate was cleared by centrifugation for 30 min at 4°C at 9500 rpm (Beckman Coulter Avanti J-E, rotor JLA-10.500). The cleared lysate was applied to 5 mL of packed Strep-Tactin Sepharose (IBA 2-1201-010) and incubated with rotation for 1 h, followed by washing of the protein-bound resin in 150 mL of lysis buffer. The resin was resuspended in 15 mL of lysis buffer supplemented with 1.2 mg of Ulp1 SUMO protease, and incubated at 4°C for 16 h with rotation. The suspension was applied to a column for elution and separation from resin by gravity flow. The resin was washed with 15 mL of lysis buffer, and this additional eluate was combined with the first 15 mL of eluate. The combined 30 mL of eluate was diluted with 30 mL of cation exchange buffer A (20 mM Tris-HCl, 5% glycerol, 1 mM DTT, pH 7.5) to lower the salt concentration for cation exchange chromatography. The resulting 60 mL protein solution was loaded onto a 5 mL HiTrap SP HP cation exchange column (GE Healthcare) via FPLC (AKTA PURE, GE Healthcare) and eluted over a 250 mM to 2 M NaCl salt gradient made by cation exchange buffer A and B (20 mM Tris-HCl, 2 M NaCl, 5% glycerol, 1 mM DTT, pH 7.5). The resulting fractions were tested for presence of the protein by NuPAGE (Invitrogen) and eStain L1 Protein Staining System (GenScript). The fractions containing the protein were pooled and concentrated by an Amicon Ultra-15 Centrifugal Filter Units (50KDa NMWL, Millipore UFC905024) to 1 mL. The concentrated protein was loaded onto a gel filtration column

(Superdex 200 Increase 10/300 GL, GE Healthcare) equilibrated with Cas12 protein storage buffer (50 mM Tris-HCl, 600 mM NaCl, 2.5% glycerol, 2 mM DTT, pH 7.5) via FPLC. The resulting fractions from gel filtration were analyzed and the fractions containing the protein were pooled, snap frozen as 2 mg/mL aliquots, and stored at -80°C.

#### *Cas12b collateral detection*

Cas12b detection reactions were performed using 1X Isothermal Amplification Buffer, 8mM MgSO<sub>4</sub>, 250 nM Cas12b protein, 250 nM sgRNA, 250 nM fluorescent reporter (/5HEX/TTTTT/3IABkFQ/) and 1 µL of completed LAMP reaction in 10 µL reactions. Cas12b detection reactions were performed at 60 °C (unless otherwise indicated) for 1-2 hrs on a qPCR machine (Roche LightCycler 480 or BioRad) with fluorescent measurements every 2 minutes.

#### *One-pot LAMP-Cas12b fluorescent reactions*

One-pot LAMP-Cas12b reactions were performed using 1X Isothermal Amplification Buffer, 1.4 mM dNTPs, 6.4 units of Bst2.0 WarmStart DNA Polymerase, 6 units of WarmStart RTx Reverse Transcriptase, 250 nM Cas12b protein, 250 nM sgRNA, 200 nM fluorescent reporter, 1.6 uM FIP/BIP primers, 0.2 uM F3/B3 primers, 0.4 uM LoopF/B primers and variable concentrations of MgSO<sub>4</sub> in 20 µL reactions. Where indicated, mock clinical sample with SARS-CoV-2 genomic standard was added at 10% of the final reaction volume to simulate crude input from sample lysis. One-pot reactions were performed at 60 °C (unless otherwise indicated) for 1-2 hrs on a qPCR machine (BioRad) with fluorescent measurements every 2 minutes.

#### *Conservation analysis of STOPCovid targeting sites*

Human SARS-CoV-2 nucleotide sequences were downloaded from GISAID database <sup>24</sup> on May 30th 2020. Completed genomes (sequence length >29,000 nt and less than 5% of ambiguous nucleotides) were aligned using mafft <sup>32</sup> to obtain a global alignment of 31,614 sequences. For each target, we extracted a sub alignment embedding the region of the target from the genome alignment and removed sequences with ambiguous nucleotides. Then, we determined the number of sequences that either perfectly matched the target or had substitutions and indels.

#### *Additive Screening*

Additives from the Hampton Research Solubility and Stability Screen (Hampton Research HR2-072) were added at 20% of the final reaction volume of one-pot LAMP-Cas12b fluorescent detection reactions unless otherwise indicated.

#### *STOPCovid Reactions*

STOPCovid reactions were one-pot LAMP Cas12b reactions described above, using N Set 2 LAMP primers, N set 2 AacCas12b sgRNA 11, and 50 mM taurine. When performing lateral flow reactions, the fluorescent reporter was substituted for a lateral flow collateral reporter (/56-FAM/TTTTTTT/3Bio/). Unless otherwise indicated, STOPCovid lateral flow reactions were

incubated at 60 °C for one hour. After incubation, a HybriDetect Dipstick (Milenia Biotec GmbH MGH1) was added to the reaction and the liquid was allowed to flow to the top of the strip for subsequent detection. The final concentration of the lateral flow collateral reporter was titrated (125-200 nM) on each lot of HybriDetect Dipsticks to achieve maximal signal-to-noise ratio. Sous-Vide cooker (Amazon B07H9N9PMQ) was used where indicated. To maximize sensitivity and specificity, the final Aap Cas12b and sgRNA concentration was titrated to 31.3 nM. This concentration was used for validating STOPCovid.v2 on patient NP and anterior nasal (AN) samples.

#### *STOPCovid multiplexed control reactions*

Multiplexed reactions were performed as described for fluorescent STOPCovid reactions, with indicated ratios of N set 2 LAMP primers to control LAMP primers and the addition of 250 nM SYTO-9 Fluorescent Nucleic Acid Stain (ThermoFisher S34854). Total LAMP Primer concentration was consistent between single target and multiplexed STOPCovid reactions.

#### *SARS-CoV-2 clinical sample collection*

Nasopharyngeal swabs were collected in PBS, viral transport medium (ThermoFisher Scientific), or universal transport media (Becton Dickinson) and submitted to the Virology Laboratory at the University of Washington. SARS-CoV-2 was detected by a laboratory-developed RT-qPCR test using CDC distributed N1 and N2 gene primer/probe sets or tests from Hologic (Panther Fusion) and Roche (cobas). The Panther Fusion SARS-CoV-2 assay (Hologic) amplifies and detects two regions of ORF1ab. The cobas SARS-CoV-2 assay on the 6800 platform (Roche Diagnostics) qualitatively detects two viral targets: ORF1ab and E-gene. The averages of the observed Ct values in each test were used to determine the overall Ct value of the SARS-CoV-2 positive samples. Previous studies have shown that the average Ct values between each assay are comparable<sup>33</sup>. After analysis, samples were stored at -80°C until further analysis. Samples from the University of Washington were shipped to the Broad Institute for evaluating STOPCovid.v1 performance.

#### *Estimation of LOD using patient samples*

Clinical samples that tested positive for SARS-CoV-2 from the cobas SARS-CoV-2 assay were stored at 4 °C and used within 12 h to determine the LOD. A five-fold serial dilution of SARS-CoV-2 positive patient NP swab samples in UTM (Becton Dickinson) were generated. For STOPCovid.v1, samples were lysed with an equal volume of DNA QuickExtract for 5 mins at 95 °C. 5 µL of lysates were used for the STOPCovid.v1 lateral flow reaction and incubated at 60 °C for one hour, following the signal readout using a HybridDetect Dipstick (Milenia). Ct 3.3 was added between the 5-fold dilutions of samples. To estimate the LOD of the STOPCovid.v2 fluorescent reaction of the total NP swab sample, three replicates of five-fold serial dilution of SARS-CoV-2 positive patient NP swab samples in UTM were generated. 50 µL of diluents were transferred to the extraction buffer (260 µL of laboratory-developed KCl magnetic beads, 40 µL

of 10X QuickExtract Plant DNA Extraction Solution, and 50  $\mu$ L water) using foam swabs (Puritan 25-1506). Nucleic acids bound to magnetic beads were subjected to a STOPCovid.v2 reaction at 60 °C on an ABI 7500 qPCR machine (Thermo Fisher) with measurements every 1 min for 45 min. Since 50  $\mu$ L of the NP swab sample in UTM, out of 3 mL total, were used, Ct 5.9 was added to the observed average Ct value of the original sample, and Ct 3.3 was added between the 5-fold dilutions of samples. To project the proportion of SARS-CoV-2 positive patients that an assay with the estimated LOD could capture, the average Ct values obtained from the dilution series were compared to the larger 2,105 patient Ct values obtained from the cobas RT-qPCR assay.

To evaluate the performance of STOPCovid.v2, a blinded test of 202 SARS-CoV-2 positive samples and 200 negative samples was performed. Similar to the dilution series, as only 50  $\mu$ L of the NP swab sample in 3mL of UTM was used instead of the entire swab, Ct 5.9 was added to the observed Ct value of the original sample, and only samples with Ct values lower than 34 were used. 50  $\mu$ L of randomized and blinded NP swab samples in UTM were transferred to 50  $\mu$ L of water and 300  $\mu$ L of extraction buffer. STOPCovid.v2 reaction was performed as described above and fluorescent measurements were taken every 2 min during a 44 min period in an ABI 7500 qPCR machine (Thermo Fisher). Fluorescence threshold for classifying samples as positive or negative was set to approximately 10% of the average steady state fluorescence signal, or 100,000 RFU on the ABI 7500 qPCR machine.

#### *Laboratory-developed magnetic bead preparation*

Laboratory-developed magnetic beads for RNA concentration were prepared as previously described<sup>26</sup>. Briefly, 10 mL of Sera-Mag SpeedBeads Carboxyl Magnetic Beads Hydrophobic (GE Healthcare 65152105050250) were washed with ddH<sub>2</sub>O and resuspended in 500 mL of bead binding buffer (10 mM Tris-HCl pH 8.0, 1M NaCl, 18 % PEG-8000, and 1mM EDTA). Where indicated, 1M NaCl was replaced with 1M KCl.

#### *Bead Extraction and Concentration*

400  $\mu$ L of laboratory-developed or commercial (SPRIselect, Beckman Coulter B23317) magnetic beads were mixed with 200  $\mu$ L of heat-inactivated (95 °C for 5 minutes). QuickExtract DNA Extraction Solution spiked with indicated quantity of SARS-CoV-2 genomic standard and 1.25  $\mu$ g of background human RNA. This mixture was allowed to bind for 5 minutes at room temperature, before transfer onto a magnetic plate (Alpaqua A001219). Beads were washed with 1 mL of 70% ethanol, and allowed to dry for 5 minutes. 50  $\mu$ L of STOPCovid mastermix was directly added to the beads and the reaction mixture was incubated at 60 °C for 1-2 hrs. Where indicated, the washing and drying steps outlined above were skipped and a modified STOPCovid mastermix was used. Specifically, a modified 1X Isothermal Amplification Buffer containing no KCl (20 mM Tris-HCl, 10 mM (NH<sub>4</sub>)<sub>2</sub>SO<sub>4</sub>, 2 mM MgSO<sub>4</sub>, 0.1% Tween 20, pH 8.8) was used in place of the buffer described above.

### *Combination of lysis and magnetic bead binding*

To evaluate our ability to perform efficient viral lysis and nucleic acid binding in parallel, 100  $\mu\text{L}$  of mock SARS-CoV-2 virus (SARS-CoV-2 RNA targets in a noninfectious viral coat) from AccuPlex SARS-CoV-2 Verification Panel (SeraCare 0505-0132) with 125 ng/ $\mu\text{L}$  background human RNA were either added to 100  $\mu\text{L}$  of lysis buffer alone or 100  $\mu\text{L}$  of lysis buffer combined with 400  $\mu\text{L}$  of laboratory-developed KCl magnetic beads. Concentrations of lysis buffers, QuickExtract DNA Extraction Solution and QuickExtract Plant DNA Extraction Solution (Lucigen QEP70750), indicated the final working concentration. Samples containing no magnetic beads were incubated at the indicated temperature for 5 minutes, followed by the addition of 400  $\mu\text{L}$  of laboratory-developed KCl magnetic beads. Samples containing combined bead/lysis mixtures were incubated at room temperature for 10 minutes. All samples were subsequently treated with the bead extraction and concentration steps described above with no wash step.

### *Comparison of STOPCovid.v2 to CDC RT-qPCR assays*

To create mock samples simulating the addition of swabs, different amounts of mock SARS-CoV-2 virus from the AccuPlex SARS-CoV-2 Verification Panel were diluted in PBS containing 25ng/ $\mu\text{L}$  background human RNA. 50  $\mu\text{L}$  of mock sample was either added to extraction buffer (400  $\mu\text{L}$  of laboratory-developed KCl magnetic beads, 60  $\mu\text{L}$  of 10X QuickExtract Plant DNA Extraction Solution, and 90  $\mu\text{L}$  of PBS) for detection with STOPCovid.v2 or to 1 mL E-MEM media for subsequent nucleic acid extraction and RT-qPCR. STOPCovid.v2 fluorescent reactions were incubated at 60 °C on a qPCR machine with measurement every 2 minutes. STOPCovid.v2 lateral flow reactions were allowed to proceed at 60 °C for 80 minutes before addition of a detection strip. RT-qPCR reactions were performed according to CDC recommendations (<https://www.fda.gov/media/134922/download>), using the N1 primer and probe set.

### *Evaluation of STOPCovid.v2 using dry anterior nasal swabs*

SARS-CoV-2 negative patient dry AN swabs (Lee Biosolutions 991-31-NC) were dipped into extraction buffer (260  $\mu\text{L}$  of laboratory-developed KCl magnetic beads, 40  $\mu\text{L}$  of 10X QuickExtract Plant DNA Extraction Solution, and 100  $\mu\text{L}$  water) for detection with STOPCovid.v2. For simulating SARS-CoV-2 positive AN swabs, water in the extraction buffer was replaced with mock SARS-CoV-2 virus from the AccuPlex SARS-CoV-2 Verification Panel. SARS-CoV-2 positive patient dry AN swabs were collected from SARS-CoV-2 positive patients at Brigham and Women's Hospital. SARS-CoV-2 positive patients were identified using NP swabs and the Panther Fusion (Hologic) assay. Dry AN swabs were collected within 48 hours of the NP swab RT-qPCR test. To collect the AN swabs, a flocked AN swab (Miraclean Technology 93050) was inserted approximately 1 inch into the left nostril of the patient. Once in place, the swab was rotated 3 times and then kept in place for 15 seconds to absorb nasal secretions. The same procedure was repeated with the right nostril using the same swab. Dry AN

swabs were stored at 4 °C and tested using STOPCovid.v2 within 24 hours as described above for negative AN swabs. Fluorescence threshold for classifying samples as positive or negative was set to approximately 10% of the average steady state fluorescence signal, or 500 RFU on the Biorad CFX96 qPCR machine.

#### *Lateral Flow Band Quantification*

Acquired images were converted to 8-bit grayscale using photoshop and then imported into ImageLab software (BioRad Image Lab Software 6.0.1). Images were inverted and lanes were manually adjusted to fit the lateral flow strips. Bands were picked automatically and the background was adjusted manually to allow band comparison. Width of bands and background adjustment was kept constant between all bands in the same image. The band intensity ratio is calculated as the intensity of the top (test) band divided by the bottom (control) band.

#### *Mobile Phone Application*

For classifying STOPCovid lateral flow strip results, the mobile application used >50 images containing >500 lateral flow strips that have been manually annotated as positive or negative to set the appropriate threshold for the band intensity ratio. As the lateral flow strip typically has a faint background for the top (test) band, this threshold was determined to be 0.14. To use the STOPCovid mobile phone application for interpreting lateral flow trip results, download the Expo application for iOS (<https://apple.co/2c6HMtp>) or Android (<https://bit.ly/2bZq5ew>). Launch the Expo application, tap "Sign in to your account", and sign in with the STOPCovid team's Expo credentials. Please contact the STOPCovid team through the STOPCovid website (<https://www.stopcovid.science/>) for credentials. Open STOPCovid from the Expo application.

## STOPCovid.v2 Reagents and Protocol

### *Sequences*

#### *LAMP Primers (IDT):*

F3: 5'– GCTGCTGAGGCTTCTAAG –3'  
B3: 5'– GCGTCAATATGCTTATTCAGC –3'  
FIP: 5'– GCGGCCAATGTTTGTAAATCAGTAGACGTGGTCCAGAACAA –3'  
BIP: 5'– TCAGCGTTCTTCGGAATGTCGCTGTGTAGGTCAACCACG –3'  
LoopF: 5'– CCTTGTCTGATTAGTTCCTGGT –3'  
LoopB: 5'– TGGCATGGAAGTCACACC –3'

#### *AapCas12b Guide RNA (Synthego):*

5'– GUCUAGAGGACAGAAUUUUUCAACGGGUGUGCCAAUGGCCACUUUCCAGGUGGCAA  
AGCCCGUUGAGCUUCUCAAAUCUGAGAAGUGGCACCGAAGAACGCUGAAGCGCUG –3'  
(The spacer targeting N gene is underlined.)

#### *AapCas12b Protein Sequence:*

MAVKSMKVKLRLDNMPEIRAGLWKLHTEVNAGVRYYTEWLSLLRQENLYRRSPNGDGE  
QECYKTAEECKAELLERLRARQVENGHCGPAGSDDELLQLARQLYELLVPPQAIGAKGD  
AQQIARKFLSPLADKDAVGGLGIKAGNKPRWVRMREAGEPGWEEKAKAEARKSTDR  
TADVLRALADFGKPLMRVYTDSDMSSVQWKPLRKGQAVRTWDRDMFQQAIERMMSWE  
SWNQRVGEAYAKLVEQKSRFEQKNFVGQEHVQLVNQLQQDMKEASHGLESKEQTAHY  
LTGRALRGSDKVFKEKWEKLDPDAPFDLYDTEIKNVQRRNTRRFGSHDLFAKLAEPKYQ  
ALWREDASFLTRYAVYNSIVRKLNHAKMFATFTLPDATAHPIWTRFDKLGGNLHQYTF  
LFNEFGGRHAIRFQKLLTVEDGVAKEVDDVTVPISMSAQLDDLLPRDPHELVALYFQ  
DYGAEQHLAGEFGGAKIQYRRDQLNHLHARRGARDVYLNLSVRVQSQSEARGERRPPY  
AAVFRLVGDNRHAFVHFDKLSDYLAEHPDDGKLGSEGLLSGLRVMSVDLGLRTSASIS  
VFRVARKDELKPNSEGRVPFCFPIEGNENLVAVHERSQLLKLPGETESKDLRAIREER  
QRTLRLRQLAYLRLLVRCGSEDVGRRERSWAKLIEQPMANQMPDWREAFEDLQ  
KLKSLYIGICGDREWTEAVYESVRRVWRHMGKQVRDWRKDVRSGERP KIRGYQKDVVGG  
NSIEQIEYLERQYKFLKSWFFGKVSQVIRAEKGSRFAITLREHIDHAKEDRLKCLA  
DRIIMEALGYVYALDDERGGKWKVAKYPPCQLILLEELSEYQFNDRPPSENNQLMQW  
SHRGVFQELLNQAQVHDLVGTMYAAFSSRFDARTGAPGIRCRVPPARCAREQNPEPF  
PWLWLNKFVAEHKLDGCPLRADDLIPTGEGEFFVSPFSAEEGDFHQIHADLNAAQNLQR  
RLWSDFDISQIRLRCDWGEVDGEPVLIPTTGKRTADSYGNKVFYTKTGVTYYERER  
KRRKRVFAQEELSEEEAELLVEADEAREKSVVLMRDPSTGIINRGDWTRQKEFWSMVNQ  
RIEGLVVKQIRSRVRLQESACENTGDI\*

*Reporter DNA (IDT):*

Fluorescence: 5'– / 5HEX/TTTTT/3IABkFQ/ –3'  
Lateral flow: 5'– / 56-FAM/TTTTTTT/3Bio/ –3'

*Patient samples*

Patient nasopharyngeal (NP) and anterior nasal (AN) swab samples should be collected and processed according to the appropriate biosafety procedure. Please reference the [2020 CDC COVID-19 test protocol](#) for details on specimen collection. Swabs that do not soak up excessive volumes (>80 µL) of extraction buffer, such as flocked swabs, should be used.

*Reagents*

*Extraction Buffer:*

- Sera-Mag SpeedBeads Carboxyl Magnetic Beads (VWR 65152105050250)
- Poly(ethylene glycol) 8,000 (Millipore Sigma 89510)
- 3 M Potassium chloride solution (Millipore Sigma 60135)
- 1 M Tris-HCl, pH 8.0 (Thermo Fisher Scientific AM9855G)
- UltraPure 0.5 M EDTA, pH 8.0 (Thermo Fisher Scientific 15575020)
- UltraPure DNase/RNase-Free Distilled Water (Thermo Fisher Scientific 10977015)
- 10× concentrated QuickExtract Plant DNA Extraction Solution (Lucigen, custom order). Once thawed, aliquot and store at –20 °C to avoid >3 freeze-thaw cycles.

*STOPCovid.v2 Reaction:*

- 1 M Tris-HCl, pH 8.0 (Thermo Fisher Scientific AM9855G)
- 2 M Ammonium sulfate solution (Millipore Sigma 76399)
- 1 M Magnesium sulfate solution (Millipore Sigma M3409)
- Tween 20 (Millipore Sigma P9416)
- Bst 2.0 WarmStart DNA Polymerase (New England BioLabs M0538L)
- WarmStart RTx Reverse Transcriptase (New England BioLabs M0380L)
- 100 mM Magnesium sulfate, supplied with M0538L and M0380L
- AapCas12b protein (New England BioLabs, custom order) or purified as described previously<sup>1</sup>
- 10 mM Deoxynucleotide (dNTP) Solution Mix (New England BioLabs N0447L)
- Taurine (Millipore Sigma 86329)
- Proteinase K Inhibitor (Millipore Sigma 539470)



- Dimethyl sulfoxide (Millipore Sigma D2650)
- UltraPure DNase/RNase-Free Distilled Water (Thermo Fisher Scientific 10977015)
- (Optional) AccuPlex SARS-CoV-2 Reference Material Kit v2 (SeraCare 0505-0133)
- (Optional) HybriDetect Dipstick (Milenia Biotec GmbH MGHD 1)

### *Equipment*

- 60 °C heat block, water bath, or sous-vide immersion cooker
- Magnetic separator
- (Optional) qPCR machine for fluorescence readout

### *Reagent Setup*

#### *Laboratory-developed magnetic beads:*

1. Vortex the Sera-Mag SpeedBeads Carboxyl Magnetic Beads for 1 min. Add 10 mL to a 50 mL conical tube.
2. Using a 50 mL magnetic separator, pellet the magnetic beads.
3. Aspirate the supernatant and discard.
4. Wash beads twice with 10 mL of ddH<sub>2</sub>O, resuspending the pellet each time by vortexing for 30 s.
5. Pellet the beads for the last time.
6. Prepare the bead buffer by mixing the following in a 500 mL reagent bottle.

| Component    | Amount |
|--------------|--------|
| 3 M KCl      | 167 mL |
| 1 M Tris-HCl | 5 mL   |
| 0.5 M EDTA   | 1 mL   |
| PEG-8000     | 90 g   |

7. Fill with ddH<sub>2</sub>O to 500 mL and invert 10 times to mix.
8. Filter through a vacuum filtration unit according to the manufacturer's instructions.
9. Remove the final wash fluid on the beads and add 10 mL of bead buffer.
10. Vortex for 30 s to resuspend the beads and transfer to the 500 mL bottle containing the bead buffer.
11. Invert to homogenize the beads with the buffer.
12. Beads can be aliquoted and stored at 4 °C for 1 month or -20 °C for up to 1 year.

#### *Extraction Buffer:*

1. Prepare the extraction buffer by mixing the following in a 50 mL conical tube.

| Component              | Amount (mL) |
|------------------------|-------------|
| Magnetic beads         | 26          |
| 10× QuickExtract Plant | 4           |
| ddH <sub>2</sub> O     | 10          |
| Total                  | 40          |

2. Aliquot for storage at –20 °C for up to 1 year. Avoid more than 1 additional freeze-thaw cycle.

*10× LAMP Primer Pool:*

1. Resuspend LAMP primers with ddH<sub>2</sub>O to 100 μM.
2. Prepare the 10× LAMP primer pool by mixing the following in a 1.5 mL tube.

| Component          | Amount (μL) |
|--------------------|-------------|
| F3 primer          | 20          |
| B3 primer          | 20          |
| FIP primer         | 160         |
| BIP primer         | 160         |
| LoopF primer       | 40          |
| LoopB primer       | 40          |
| ddH <sub>2</sub> O | 560         |
| Total              | 1000        |

3. Aliquot for storage at –20 °C for up to 1 year.

*10× STOPCovid.v2 reaction buffer:*

1. Prepare the 10× STOPCovid.v2 reaction buffer by mixing the following in a 15 mL conical tube.

| Component                                       | Initial concentration | Final concentration | Amount (mL) |
|-------------------------------------------------|-----------------------|---------------------|-------------|
| Tris-HCl                                        | 1 M                   | 0.2 M               | 2           |
| (NH <sub>4</sub> ) <sub>2</sub> SO <sub>4</sub> | 2 M                   | 0.1 M               | 0.5         |
| Mg <sub>2</sub> SO <sub>4</sub>                 | 1 M                   | 0.02 M              | 0.2         |
| Tween 20                                        | 100 %                 | 1 %                 | 0.1         |
| ddH <sub>2</sub> O                              |                       |                     | 7.2         |
| Total                                           |                       |                     | 10          |

2. Adjust the pH of the solution to 8.8. The pH should be very close to 8.8 before adjusting.
3. Aliquot for storage at  $-20\text{ }^{\circ}\text{C}$  for up to 1 year.

*500 mM Taurine:*

1. Resuspend 6.258 g of Taurine in 100 mL of ddH<sub>2</sub>O. Heating at  $37\text{ }^{\circ}\text{C}$  may be required for resuspension.
2. Aliquot for storage at room temperature for up to 1 year.

*10× Proteinase K Inhibitor:*

1. Resuspend 10 mg of Proteinase K Inhibitor with 150  $\mu\text{L}$  of DMSO to make the stock solution.
2. Dilute stock solution 1:100 with ddH<sub>2</sub>O to make working aliquots. Store both stock and working solutions at  $-20\text{ }^{\circ}\text{C}$  for up to 1 year.

*STOPCovid.v2 reaction:*

1. Prepare the STOPCovid.v2 reaction by mixing the following for one reaction. Scale up volume as needed for additional reactions.

| Component                       | Initial concentration            | Final concentration | Amount ( $\mu\text{L}$ ) |
|---------------------------------|----------------------------------|---------------------|--------------------------|
| STOPCovid.v2 reaction buffer    | 10×                              | 1×                  | 5                        |
| dNTPs                           | 10 mM                            | 1.4 mM              | 7                        |
| Mg <sub>2</sub> SO <sub>4</sub> | 100 mM                           | 8 mM                | 4                        |
| Bst 2.0 DNA Polymerase          | 8,000 units/mL                   | 320 units/mL        | 2                        |
| RTx Reverse Transcriptase       | 15,000 units/mL                  | 300 units/ml        | 1                        |
| LAMP primer pool                | 10×                              | 1×                  | 5                        |
| AapCas12b protein               | 2 mg/mL or<br>15.4 $\mu\text{M}$ | 31.25 nM            | 0.102                    |
| AapCas12b sgRNA                 | 100 $\mu\text{M}$                | 31.25 nM            | 0.0156                   |
| Reporter DNA (fluorescence)*    | 100 $\mu\text{M}$                | 250 nM              | 0.125                    |
| Taurine                         | 500 mM                           | 50 mM               | 5                        |
| Proteinase K Inhibitor          | 10×                              | 1×                  | 5                        |
| ddH <sub>2</sub> O              |                                  |                     | 15.757                   |
| Total                           |                                  |                     | 50                       |

\*If performing lateral flow readout, use the lateral flow reporter instead of the fluorescence reporter, at a final concentration of 125-500 nM titrated for best signal-to-

- noise on each lot of Milenia HybriDetect Dipstick.
2. Aliquot and store at  $-20\text{ }^{\circ}\text{C}$  for up to 1 year.

### *Protocol*

1. Thaw extraction buffer and STOPCovid.v2 reaction at room temperature. Keep STOPCovid.v2 reaction on ice after thawing. Allow extraction buffer to equilibrate to room temperature before proceeding.
2. Vortex extraction buffer for 15s.
3. Dip dry NP or AN swab in 400  $\mu\text{L}$  of extraction buffer in a 1.5 mL tube. Swirl swab against the side of the tube to dislodge material.
4. Vortex or pipette to mix. Incubate at room temperature for 10 mins.
5. Place sample and extraction buffer mix on magnet. Wait 5 mins or until solution is clear.
6. Aspirate the supernatant. Make sure to remove all of the supernatant.
7. Add 50  $\mu\text{L}$  of STOPCovid reaction. Remove tube from magnet and spin down beads using a microcentrifuge.
8. Vortex or pipette to mix.
9. Pellet the beads at  $5,000\times g$  for 1 min. Lower speeds or a plate spinner may work as well.
10. Depending on the readout method:
  - Fluorescence readout:*
    - a. Run the reaction at  $60\text{ }^{\circ}\text{C}$  for 45 mins
    - b. Read out the fluorescence using the VIC/HEX channel on a qPCR machine.
  - Lateral flow readout:*
    - a. Run the reaction at  $60\text{ }^{\circ}\text{C}$  for 80 mins.
    - b. To prevent sample contamination, transfer sample to a different work area. Place a HybriDetect Dipstick into each reaction and wait for the reaction to flow through the dipstick. Generally, 2 mins is enough time to develop a positive band at the limit of detection.

## Supplementary Figures

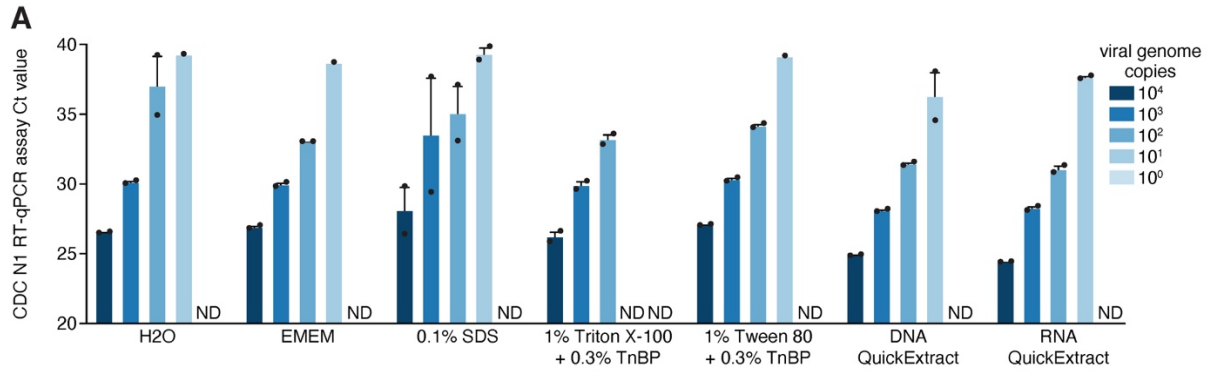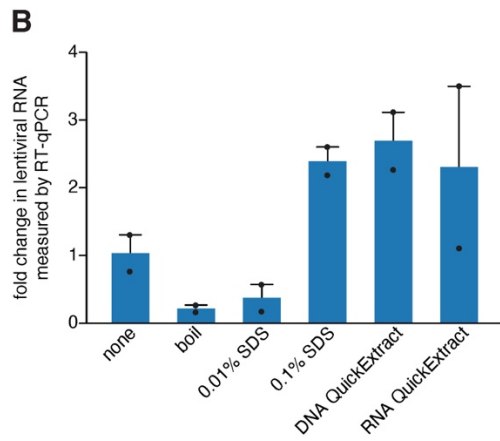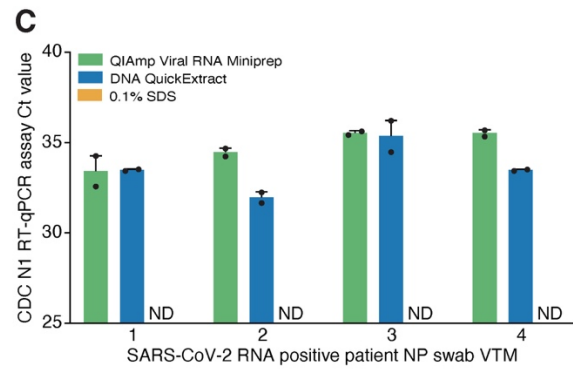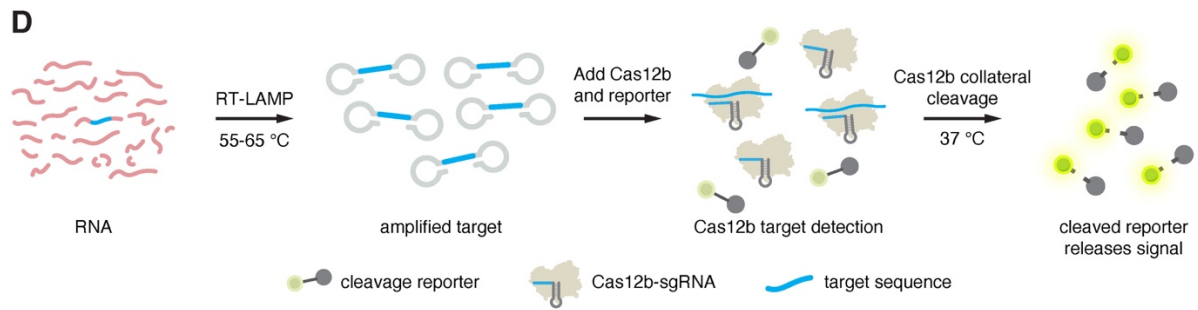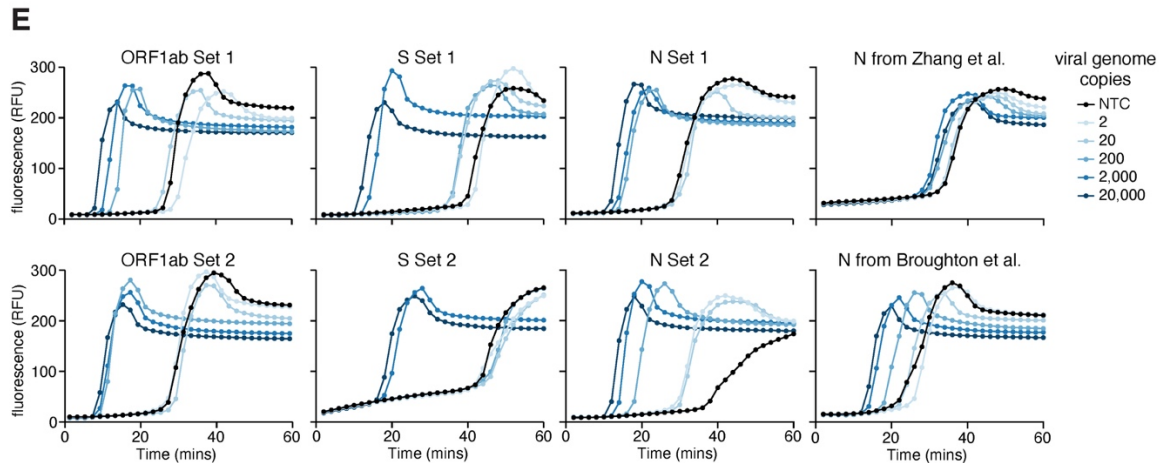

**Fig. S1 | Sample extraction using DNA QuickExtract and top LAMP primer sets targeting SARS-CoV-2.** **A**, Effects of different lysis buffers on RT-qPCR. Different amounts of SARS-CoV-2 genomic standards were spiked into lysis buffers and used as input for the CDC N1 RT-qPCR assay. **B**, Comparison of lysis buffers for extracting lentiviral RNA measured by RT-qPCR targeting the RFP RNA. **C**, Comparison of lysis buffers to the standard QIAmp Viral RNA Miniprep extraction on SARS-CoV-2 RNA positive patient nasopharyngeal (NP) swab viral transport media (VTM). The 0.1 % SDS condition did not produce any detectable Ct values. ND, not detected. **D**, Schematic of reverse transcription followed by Loop-mediated Isothermal Amplification (RT-LAMP) and CRISPR-mediated detection. Viral RNA is reverse transcribed and amplified using RT-LAMP. Cas12b detection of the LAMP product triggers collateral cleavage of a reporter to produce signal for detection. **E**, Comparison of LAMP primer sets targeting different regions of the SARS-CoV-2 genome to two established LAMP primer sets measured by real-time fluorescence across a range of concentrations of SARS-CoV-2 RNA amplicons at 65 °C. NTC, no template control.

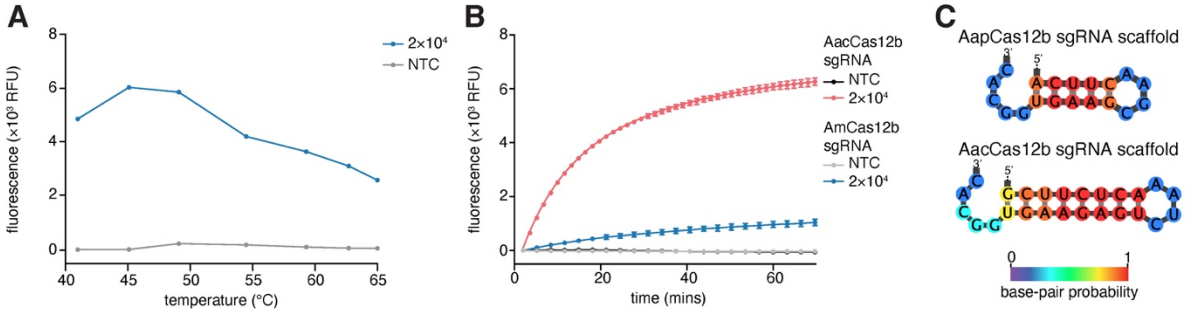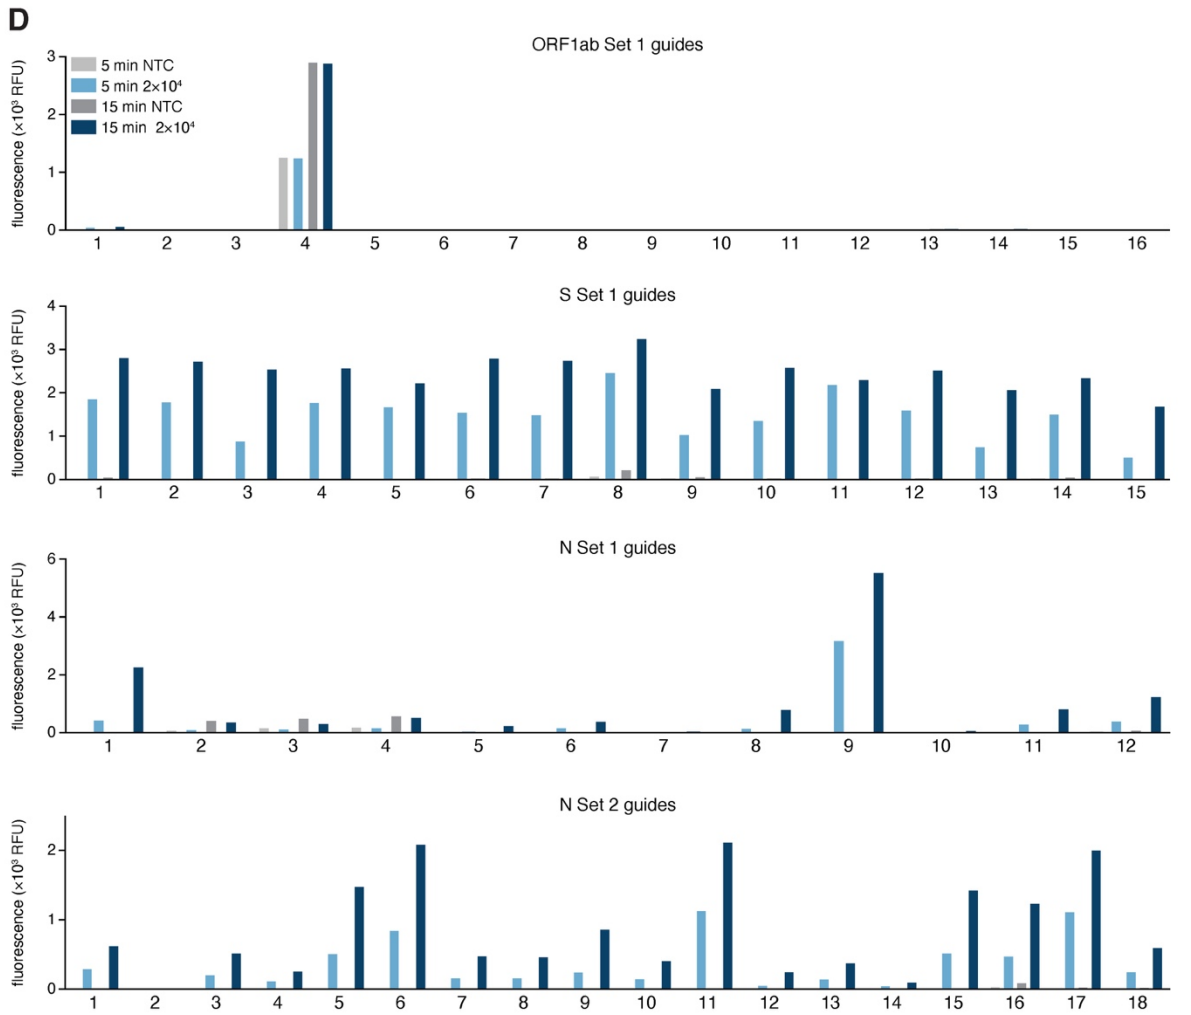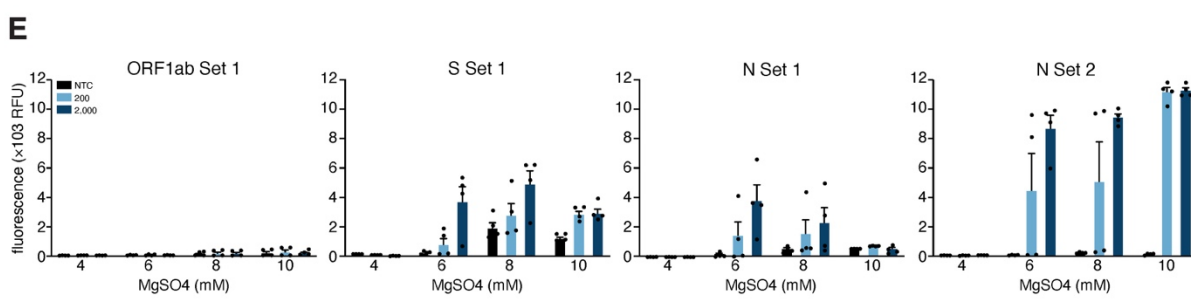

**Fig. S2 | Optimization of Aap sgRNAs targeting SARS-CoV-2 LAMP amplicons for one-pot reactions.** **A**, Temperature dependence of AapCas12b collateral activity when incubated with RT-LAMP amplified SARS-CoV-2 genomic standards. Collateral activity was measured as end point fluorescence after incubation. **B**, Comparison of AapCas12b collateral activity with either a previously published AmCas12b sgRNA scaffold<sup>18</sup> or an AacCas12b-based scaffold when incubated with RT-LAMP amplified SARS-CoV-2 genomic standards. **C**, Comparison of 3' end of Aap and Aac Cas12b sgRNA scaffolds. Color indicates base-pairing probability determined by RNAfold. **D**, Collateral activity of AapCas12b using different guides (Table S4) when incubated with RT-LAMP amplified SARS-CoV-2 genomic standards or no template control, NTC. Assay was performed at 60 °C and collateral activity was measured by fluorescence after 5 and 15 mins. **E**, Comparison of the best Cas12b sgRNA targeting each of the 4 top LAMP sets at different Magnesium concentrations in the reaction. Different amounts of SARS-CoV-2 genomic standards spiked into NP swab were used as input. NTC, no template control.



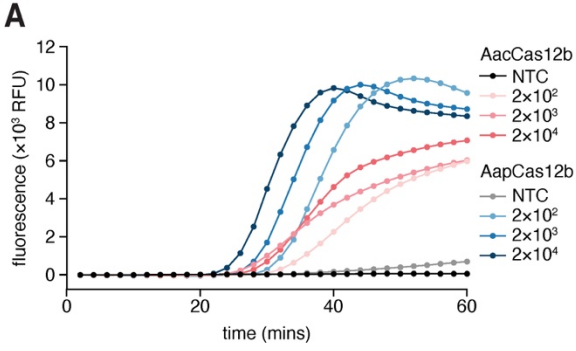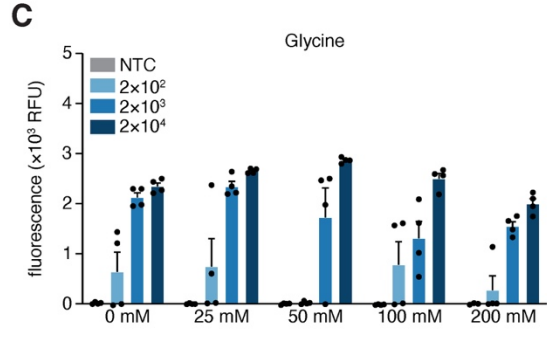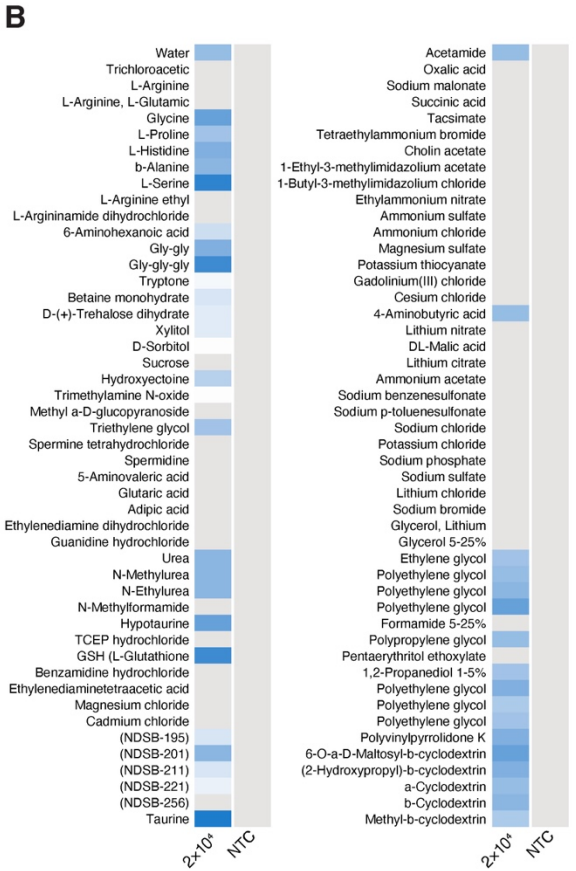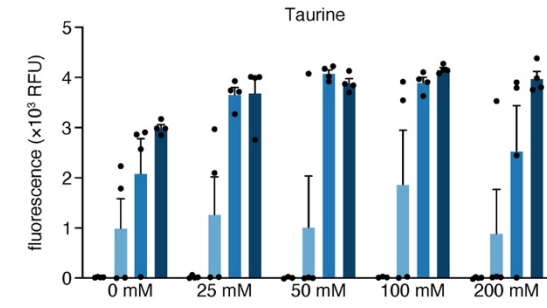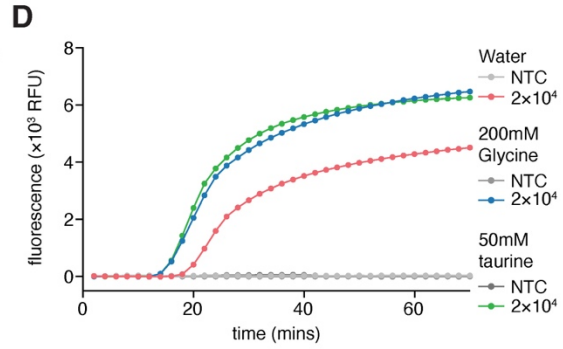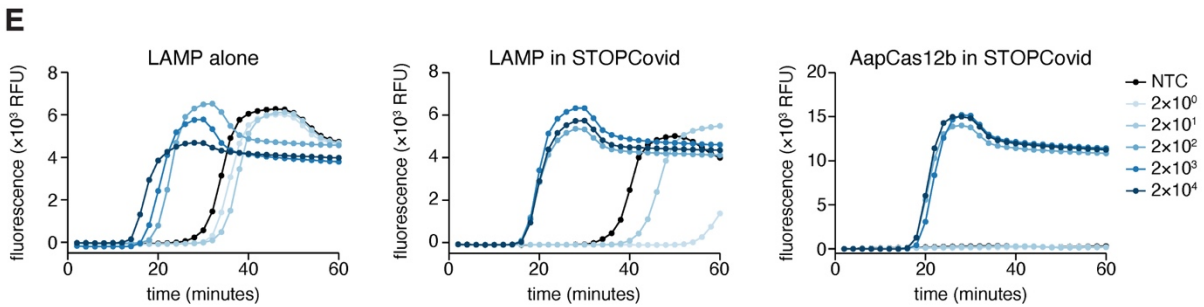

**Fig. S3 | Optimization of STOPCovid with additive reagents.** **A**, Comparison of STOPCovid performance (monitored by real-time fluorescence) when using either AacCas12b or AapCas12b and varying amounts of SARS-CoV-2 genomic standards. AacCas12b sgRNA was used for both enzymes. **B**, Heat map comparing a panel of chemical additives for effects on the performance of STOPCovid for detection of  $2 \times 10^4$  copies of SARS-CoV-2 genomic standards spiked into NP swab. **C**, Titration of Glycine and Taurine additive concentrations for effects on performance of STOPCovid detection of varying amounts of SARS-CoV-2 genomic standards spiked into NP swab. **D**, STOPCovid fluorescence signal over time with either glycine or taurine additives. **E**, Comparison of fluorescence signal generated by LAMP alone (left), LAMP in STOPCovid (middle), and AapCas12b in STOPCovid (right) for varying amounts of SARS-CoV-2 genomic standards. LAMP signal was measured using SYTO9 nucleic acid stain and AapCas12b signal was measured using collateral cleavage of a HEX reporter. NTC, no template control.

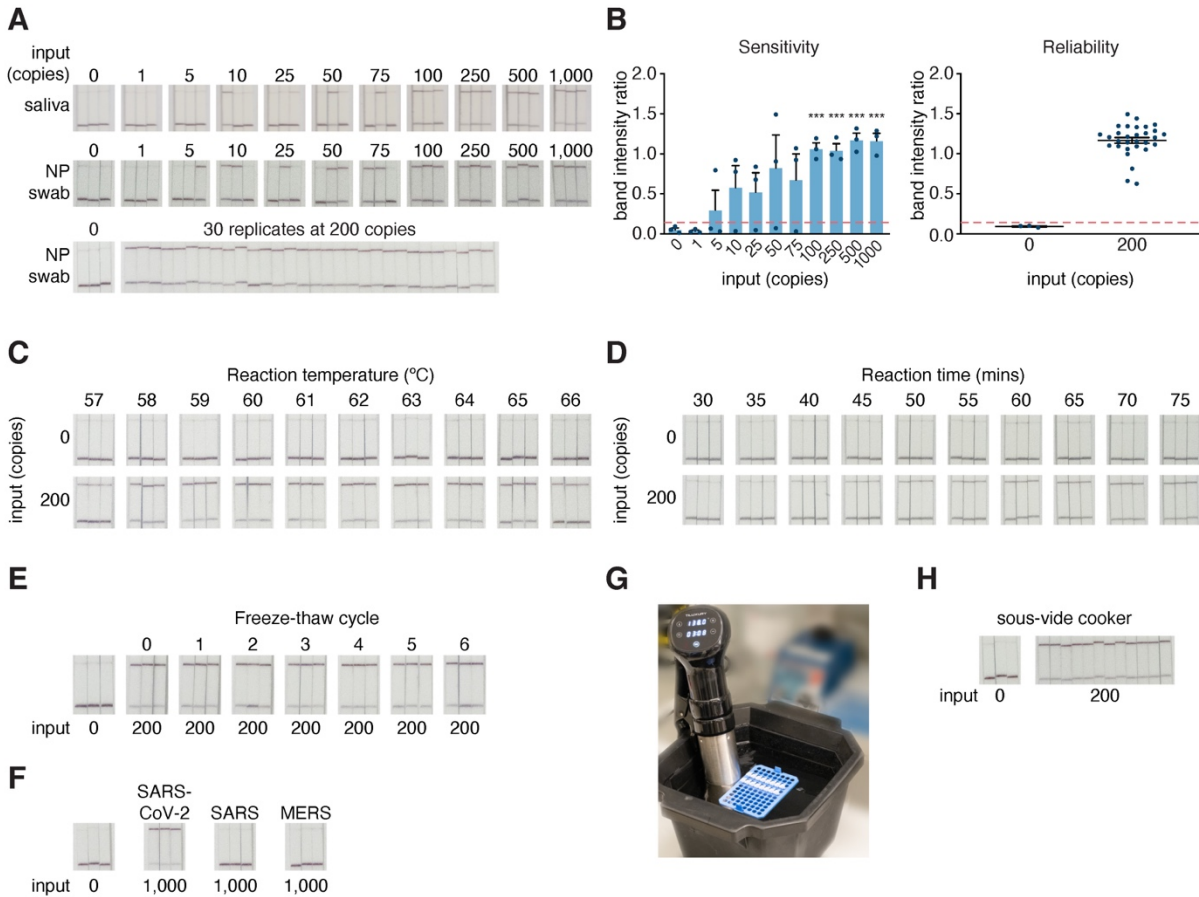

**Fig. S4 | Performance of STOPCovid.v1 with lateral flow readout.** **A**, Determination of the sensitivity for STOPCovid.v1 with lateral flow readout at 60 minutes using three replicates per condition. Different amounts of SARS-CoV-2 genomic standards spiked into saliva (top) or nasopharyngeal (NP) swab (middle) were lysed by adding an equal volume of DNA QuickExtract and heating for 5 mins at 95 °C. At 200 genome copies per reaction in NP swab, STOPCovid.v1 yielded positive results for all 30 replicates (bottom). **B**, Quantitation of the band intensity ratio (top band/bottom band) for the NP swab sensitivity (left) and reproducibility (right) from panel (A). \*\*\*,  $P < 0.001$ . Red dashed line indicates threshold for classification. **C**, Effect of reaction temperature on STOPCovid.v1 lateral flow detection for 200 SARS-CoV-2 copies per reaction. **D**, Effect of reaction incubation time on STOPCovid.v1 lateral flow detection for 200 SARS-CoV-2 copies per reaction. **E**, Effect of mastermix freeze-thaw cycles on STOPCovid.v1 lateral flow detection for 200 SARS-CoV-2 copies per reaction. **F**, Evaluation of cross-reactivity for COVID-19 STOPCovid.v1 lateral flow test for gene N from SARS and MERS. All inputs were at 1,000 copies per reaction. **G**, Example STOPCovid.v1 setup using a 60°C water bath powered by a simple commercial sous-vide device. **H**, STOPCovid.v1 lateral flow detection of SARS-CoV-2 at 200 copies per reaction using a 60°C sous-vide water bath.

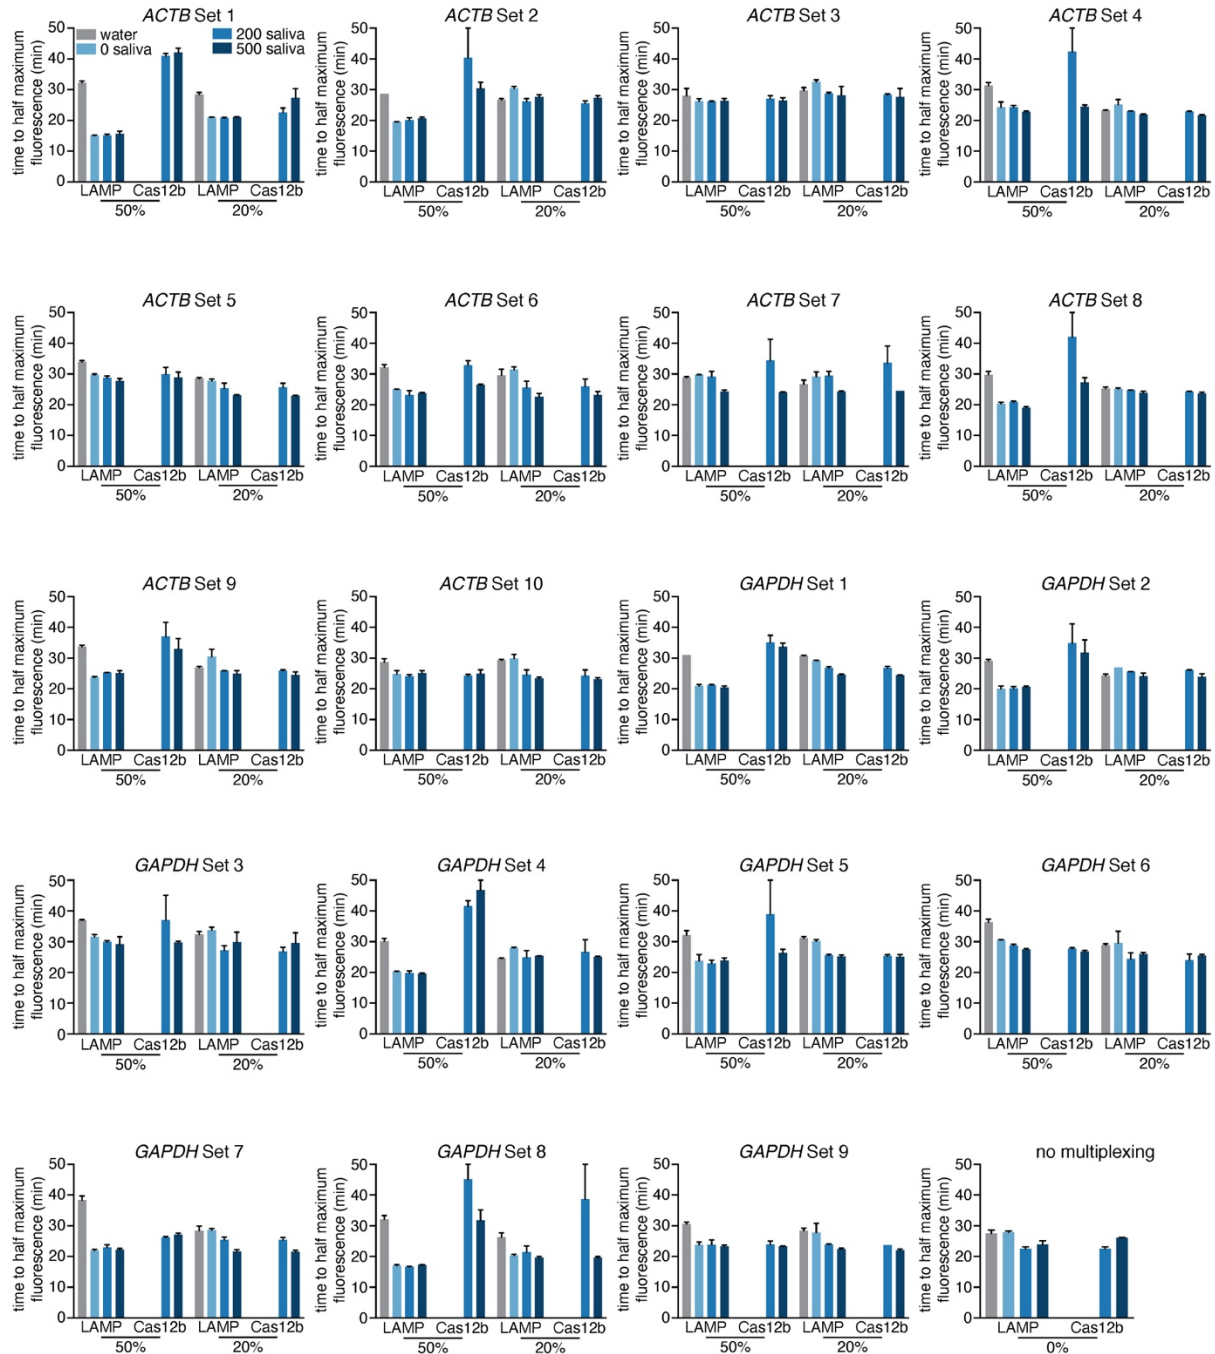

**Fig. S5 | Multiplexing internal control LAMP primer sets in STOPCovid.v1.** Comparison of LAMP primer sets targeting *ACTB* and *GAPDH* genes to control for sample extraction and isothermal amplification on different amounts of SARS-CoV-2 genomic standards spiked into saliva or water control. Control primer sets were mixed with the STOPCovid.v1 LAMP primer set targeting the N gene at 50% or 20% of the total primer concentration. LAMP signal was detected using the SYTO9 nucleic acid stain and Cas12b signal was detected via collateral cleavage of a HEX reporter probe. Values indicate time to reach the half maximum fluorescence for each reaction.

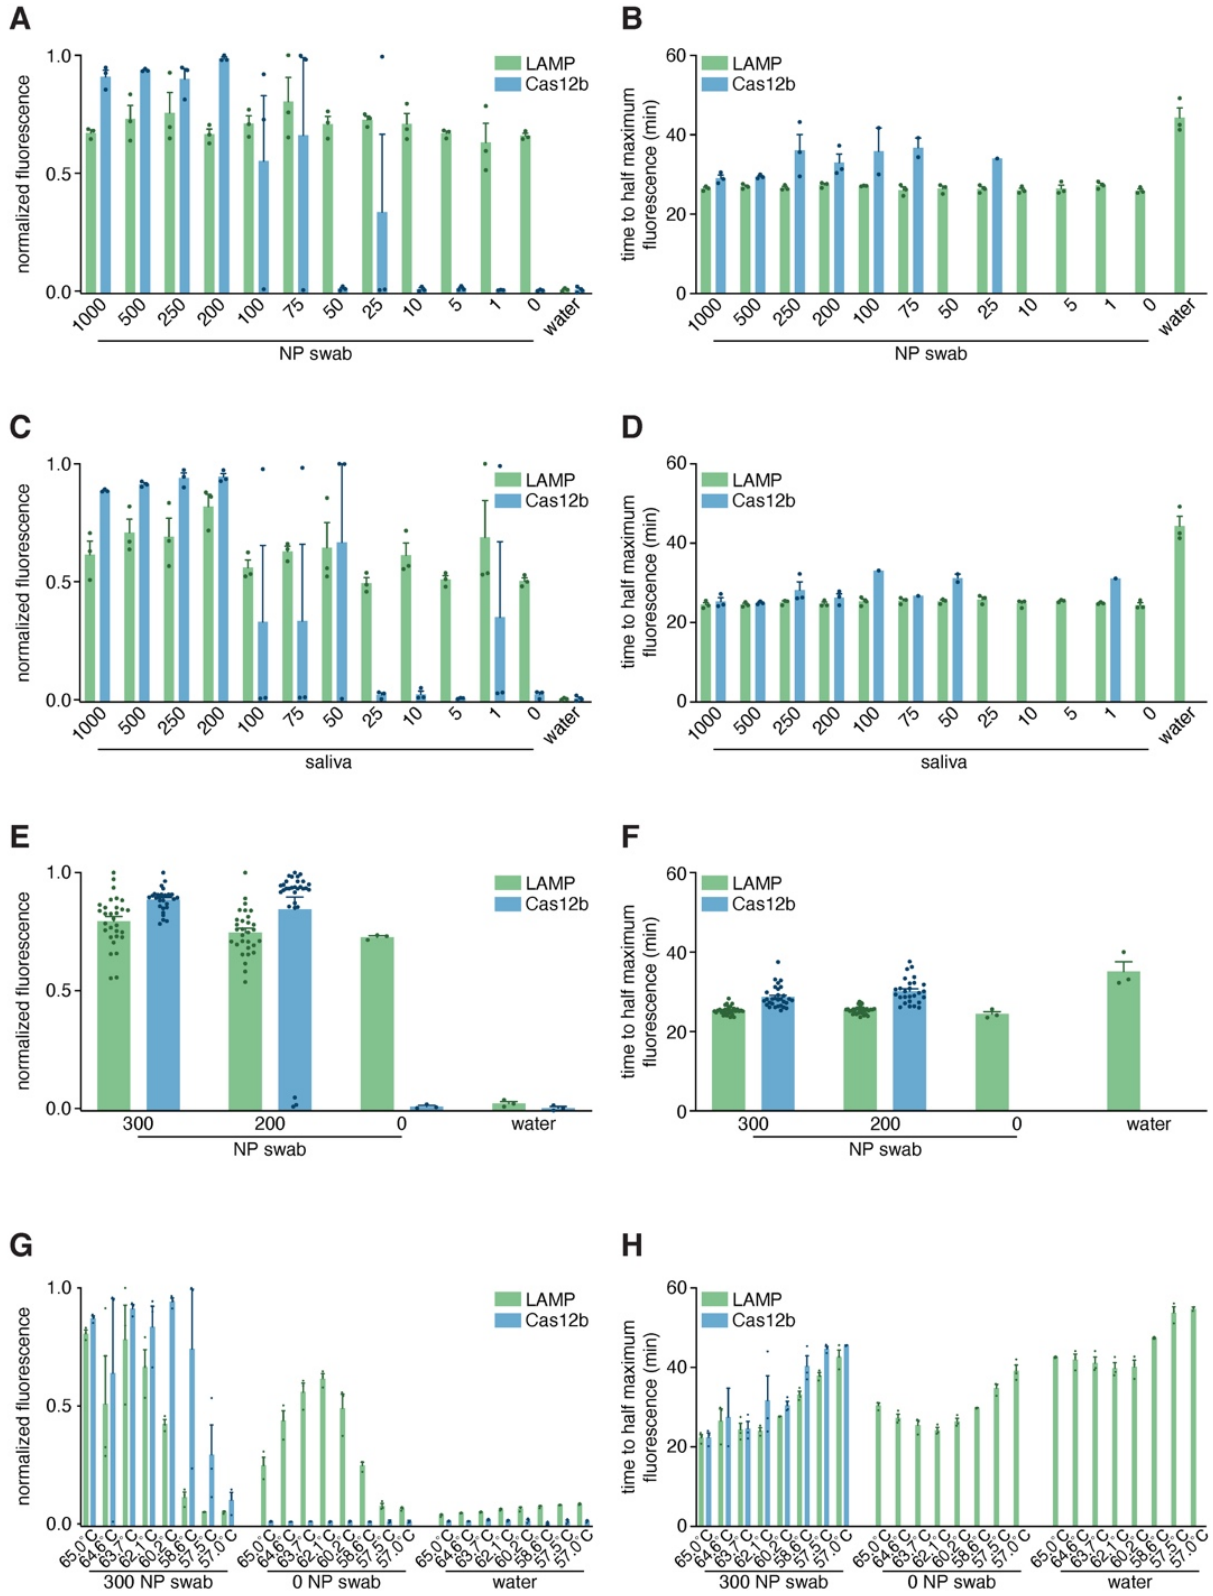

**Fig. S6 | Performance of multiplexed STOPCovid.v1 fluorescence readout.** LAMP primer sets targeting *ACTB* or the SARS-CoV-2 gene N were pooled at 20% and 80% of the total primer concentration respectively. LAMP signal was detected using the SYTO9 nucleic acid stain and Cas12b signal was detected via collateral cleavage of a HEX reporter probe. Endpoint normalized fluorescence signal was determined at 28 mins for LAMP and at 45 mins for Cas12b.

**A,** Determination of the sensitivity for multiplexed STOPCovid.v1 with fluorescence readout using three replicates per condition. Different amounts of SARS-CoV-2 genomic standards spiked into nasopharyngeal (NP) swab was used for input. Values represent endpoint normalized fluorescence. **B,** Same as (A) with values indicating time to reach the half maximum fluorescence. **C,** Determination of sensitivity for multiplexed STOPCovid.v1 using SARS-CoV-2 genomic standards spiked into saliva as input. Values represent endpoint fluorescence signals. **D,** Same as (C) with values indicating time to reach the half maximum fluorescence. **E,** Reliability assessment of multiplexed STOPCovid.v1 using 30 replicates at 300 copies and 200 copies of SARS-CoV-2 genomic standards spiked into NP swab. **F,** Same as (E) with values indicating time to reach the half maximum fluorescence. **G,** Effect of reaction temperature on multiplexed STOPCovid.v1 detection for 300 SARS-CoV-2 copies spiked into NP swab per reaction. Data represents three replicates per condition. **H,** Same as (G) with values indicating time to reach the half maximum fluorescence.



**A**

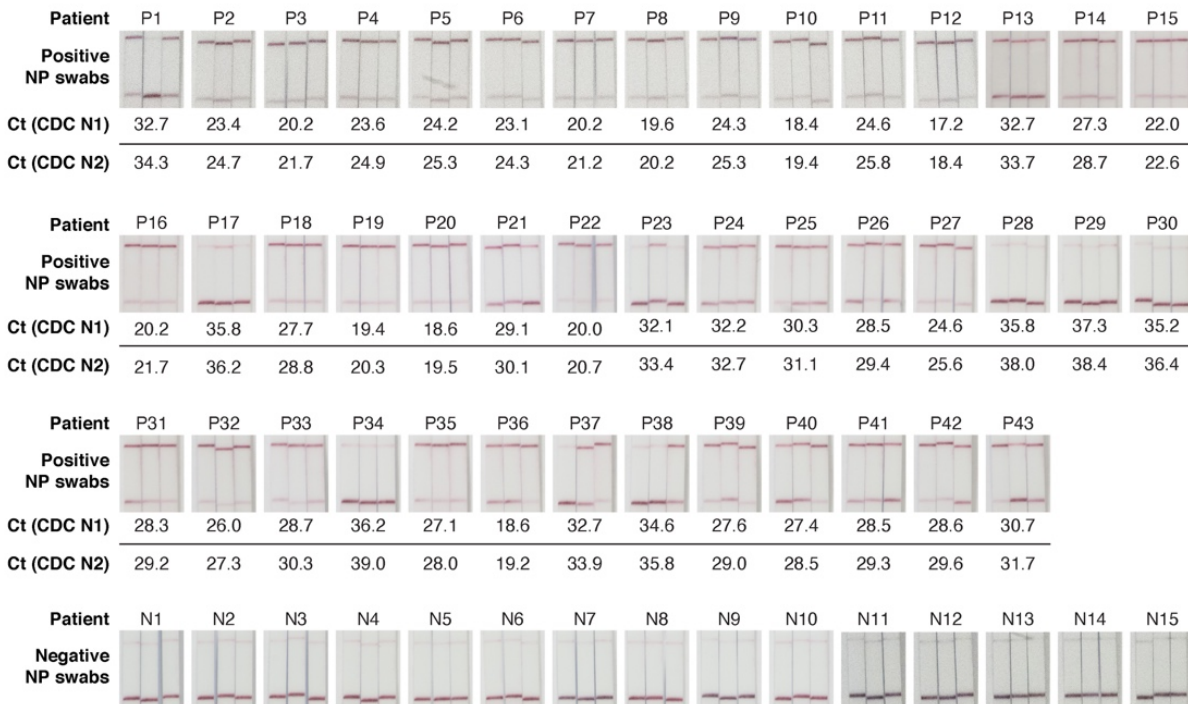

**B**

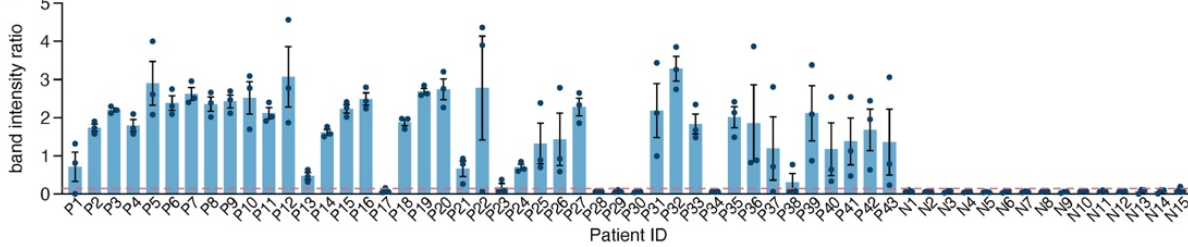

**C**

**Broad Institute SAR-CoV-2 infection status**

|                                    | Pos.           | Neg.           | Total | Predictive value |
|------------------------------------|----------------|----------------|-------|------------------|
| STOPCovid.v1 Pos. (2/3 replicates) | 36 (True pos.) | 0 (False pos.) | 36    | PPV=100%         |
| STOPCovid.v1 Neg. (2/3 replicates) | 7 (False neg.) | 15 (True neg.) | 22    | NPV=68%          |
| Total                              | 43             | 15             |       |                  |

Sensitivity 84%      Specificity 100%

**D**

**UW Virology SAR-CoV-2 infection status**

|                                    | Pos.           | Neg.           | Total | Predictive value |
|------------------------------------|----------------|----------------|-------|------------------|
| STOPCovid.v1 Pos. (2/3 replicates) | 16 (True pos.) | 0 (False pos.) | 16    | PPV=100%         |
| STOPCovid.v1 Neg. (2/3 replicates) | 3 (False neg.) | 7 (True neg.)  | 10    | NPV=70%          |
| Total                              | 19             | 7              |       |                  |

Sensitivity 84%      Specificity 100%

**E**

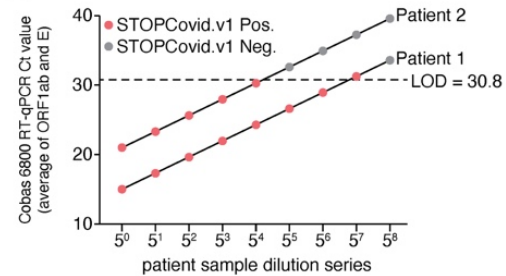

**Fig. S7 | Evaluation of STOPCovid.v1 on SARS-CoV-2 patient nasopharyngeal swab samples.** **A**, STOPCovid.v1 results for 43 unique SARS-CoV-2 positive and 15 negative patient nasopharyngeal (NP) swab samples in triplicate detected by lateral flow readout. Prior to STOPCovid.v1, NP swab viral transport media (VTM) was lysed by adding an equal volume of DNA QuickExtract and heating for 5 mins at 95 °C. **B**, Quantification of the band intensity ratios of lateral flow results from panel (A). Red dashed line indicates threshold for classification. **C**, Table summarizing the STOPCovid.v1 results on patient NP swab samples tested at Broad Institute. STOPCovid.v1 results were considered positive if 2 out of 3 replicates were positive. **D**, Table summarizing STOPCovid.v1 results on patient NP swab samples tested at the University of Washington Virology lab. **E**, Determination of the limit of detection using 5-fold serial dilutions of SARS-CoV-2 positive patient NP swab samples. Ct values represent the average of ORF1ab and E gene assays from the Cobas 6800 RT-qPCR assay.



**A**

Lysis: 10 min at 60 °C

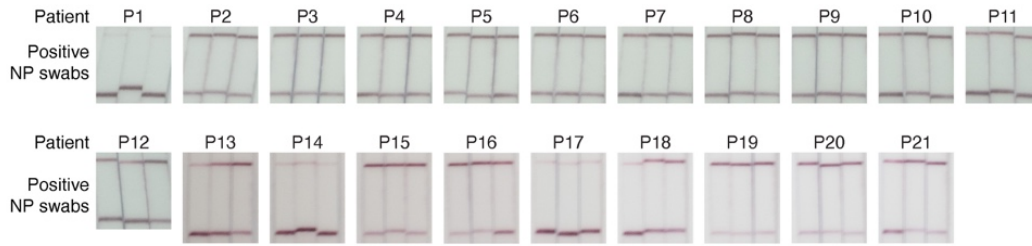

**B**

Lysis: 10 min at 22 °C

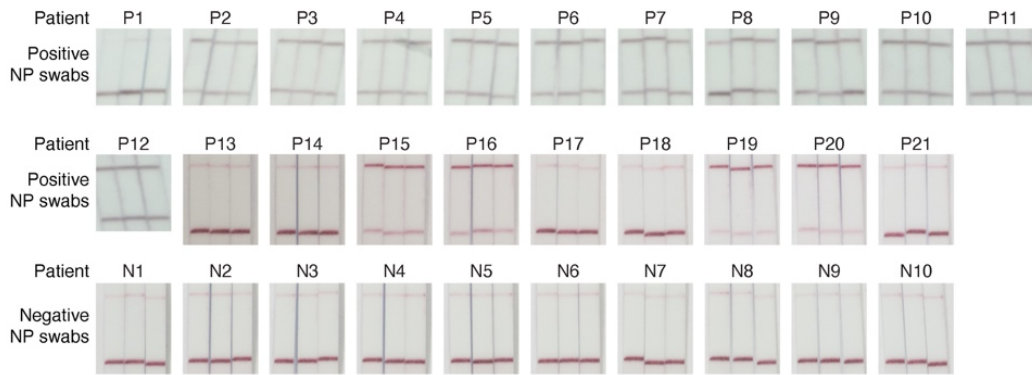

**C**

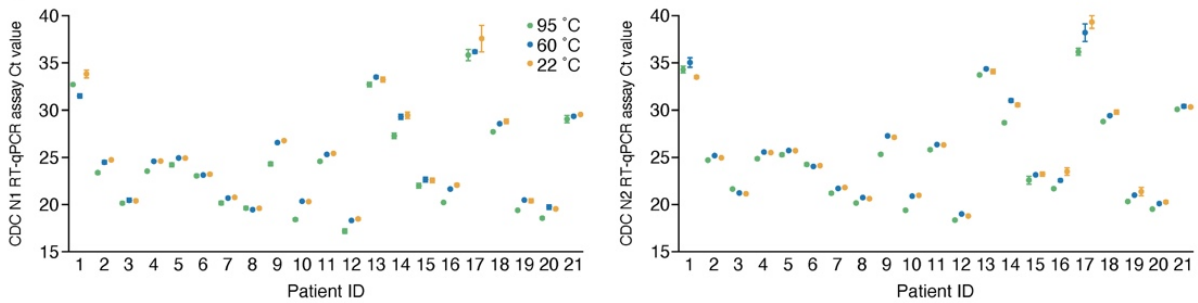

**D**

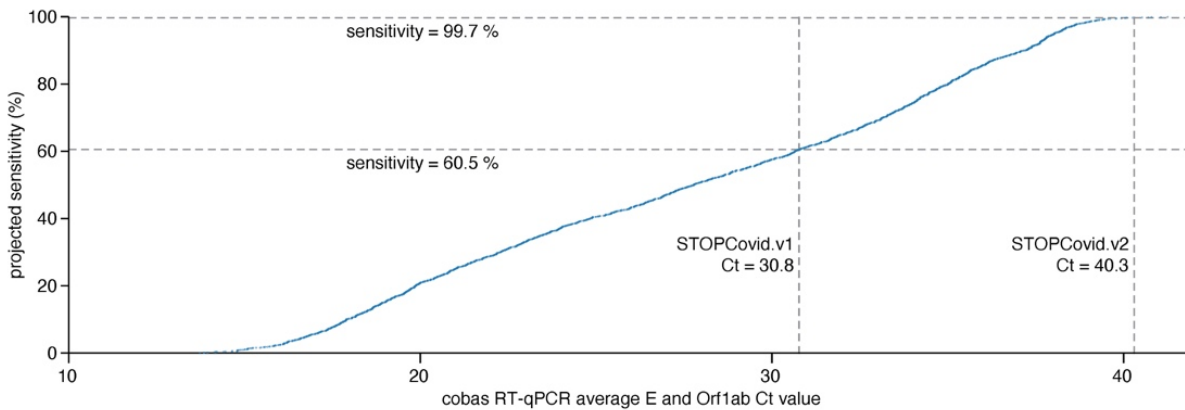

**Fig. S8 | Lysis temperature optimization and Ct distribution of SARS-CoV-2 patient nasopharyngeal swab samples.** **A**, STOPCovid.v1 results for 21 unique SARS-CoV-2 positive and 10 negative patient nasopharyngeal (NP) swab samples in triplicate detected by lateral flow readout. Prior to STOPCovid.v1, NP swab viral transport media (VTM) was lysed by adding an equal volume of DNA QuickExtract and heating for 10 mins at 60 °C. **B**, Same as **(A)** lysed for 10 mins at 22 °C. **C**, Comparison of Ct values for the same set of samples lysed at 95°C, 60°C and 22°C from panels **(A)** and **(B)** and Fig. S7A. For patients 9 and 10, due to the low volume of samples available, samples lysed at 60°C and 22°C were diluted 1:2 prior to STOPCovid.v1 and RT-qPCR. **D**, Scatterplot of 2,105 SARS-CoV-2 positive patient Ct values from the University of Washington Virology lab. Patient NP swab samples were tested using the cobas SARS-CoV-2 assay. The averages of ORF1ab and E-gene Ct values are shown. For samples with undetected ORF1ab or E-gene results, only the Ct value of the detected assay is shown.

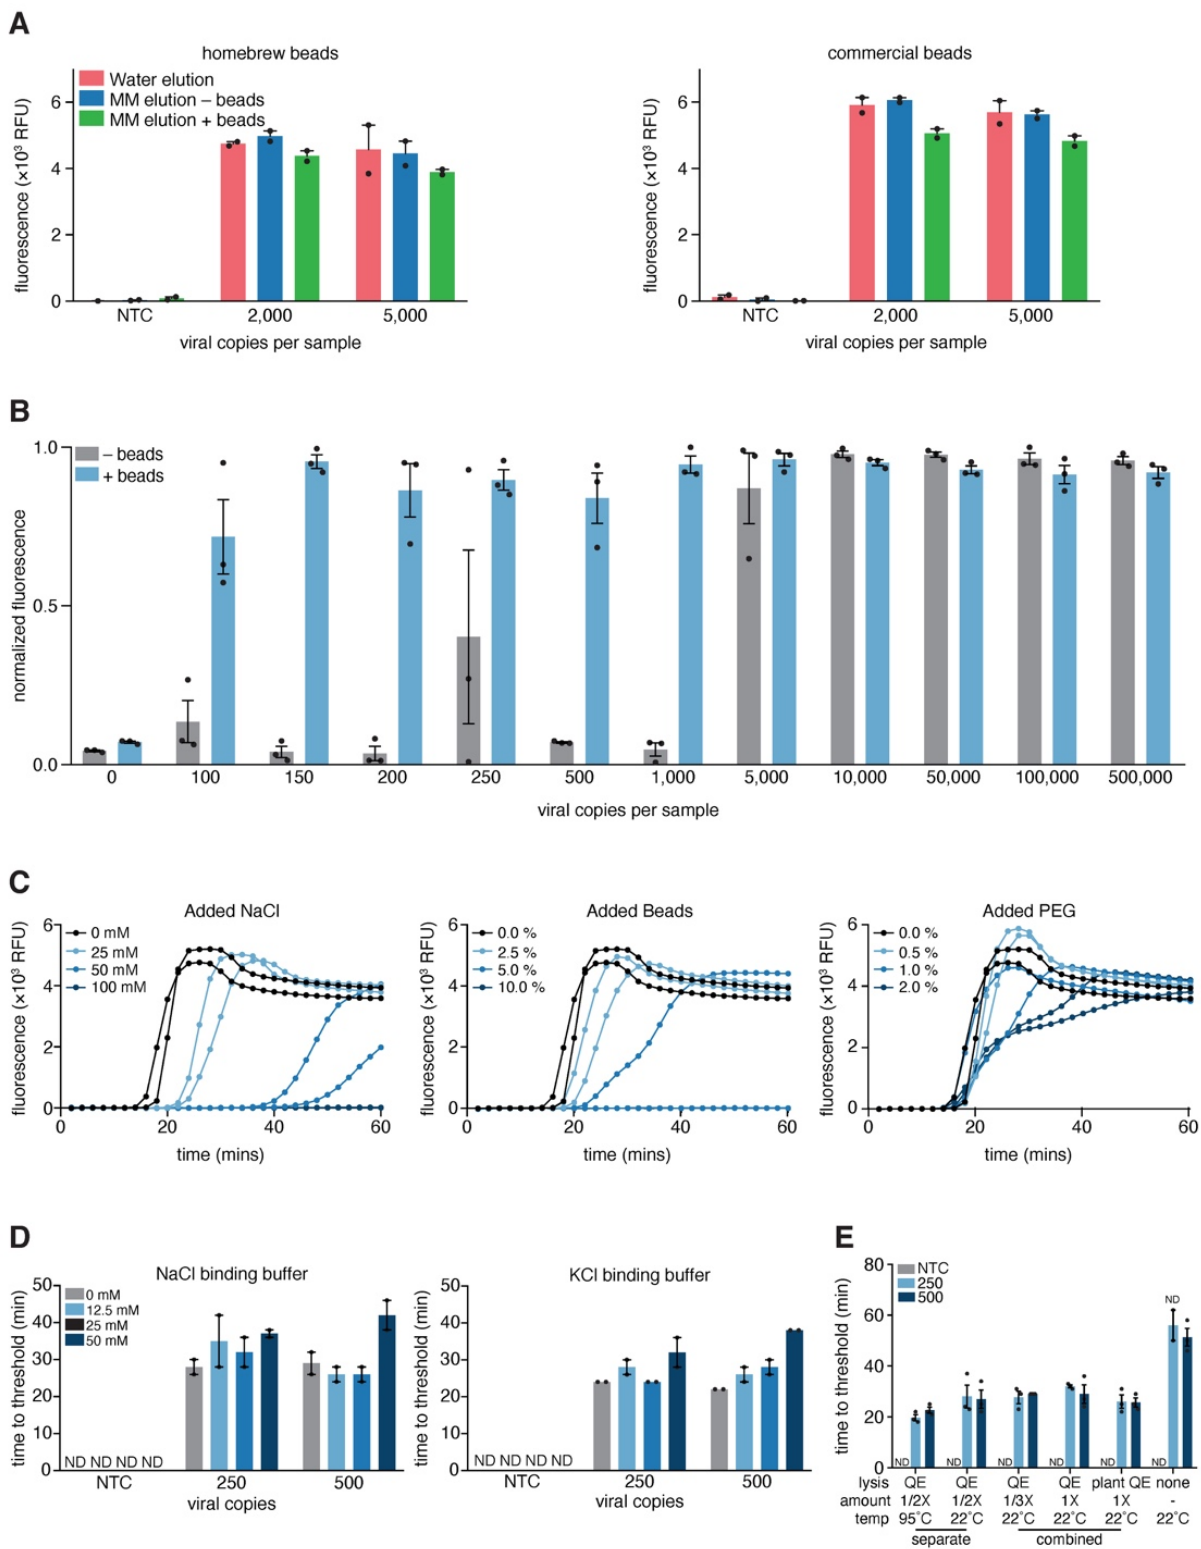

**Fig. S9 | Optimization of STOPCovid.v2 by concentration sample input using magnetic bead concentration.** **A**, Comparison of laboratory-developed<sup>26</sup> and commercial (Beckman SPRIselect) magnetic bead formulations for sample concentration prior to STOPCovid.v2. Samples were eluted in water, STOPCovid.v2 mastermix (MM), or STOPCovid.v2 mastermix retaining the magnetic beads. Values represent endpoint fluorescence signal at 45 mins. **B**, Determination of the sensitivity for purification with and without beads using fluorescence readout. Different amounts of SARS-CoV-2 genomic standards spiked into 200  $\mu$ L of DNA QuickExtract with 1.25  $\mu$ g of human RNA were used as the starting sample for both methods. **C**, Titration of different magnetic bead buffer components in STOPCovid.v2 reactions using 1,000 SARS-CoV-2 genomic standards spiked into 200  $\mu$ L of DNA QuickExtract with 1.25  $\mu$ g of human RNA. Fluorescence traces represent data from two biological replicates. **D**, Comparison of magnetic beads with either 1M NaCl (top) or KCl (bottom) in the buffer for sample concentration without ethanol wash prior to STOPCovid.v2. STOPCovid.v2 reactions contained varying concentrations of KCl. Different amounts of SARS-CoV-2 genomic standards spiked into 200  $\mu$ L of DNA QuickExtract with 1.25  $\mu$ g of human RNA were used as the starting sample. **E**, Comparison of different lysis approaches: buffer, amount of buffer, and temperature, either as a separate step or combined with magnetic bead binding. Mock SARS-CoV-2 virus (SARS-CoV-2 RNA targets in a noninfectious viral coat) were used to assess lysis efficacy. NTC, no template control. ND, not detected.

**A**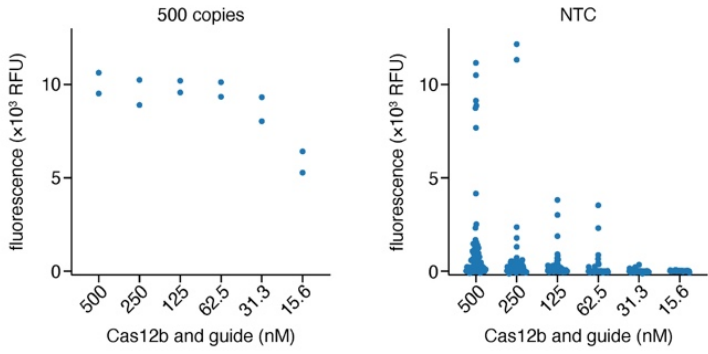**B**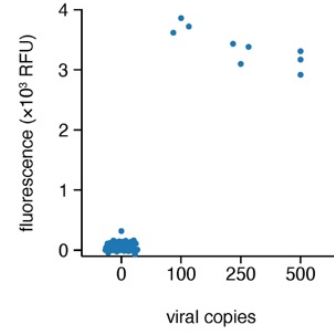**C**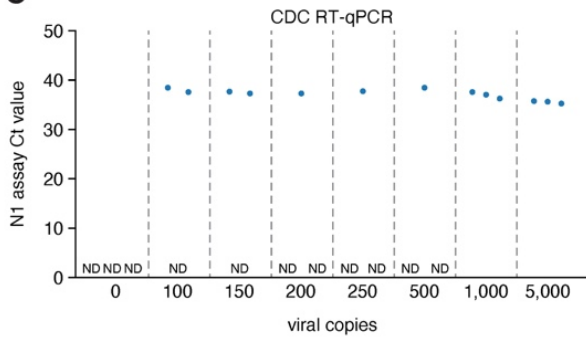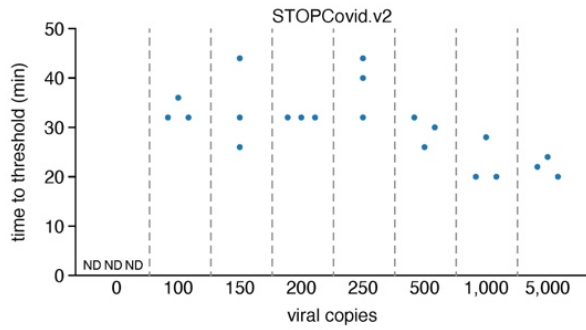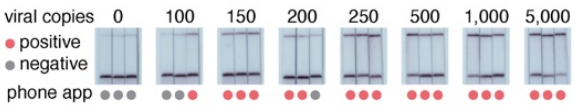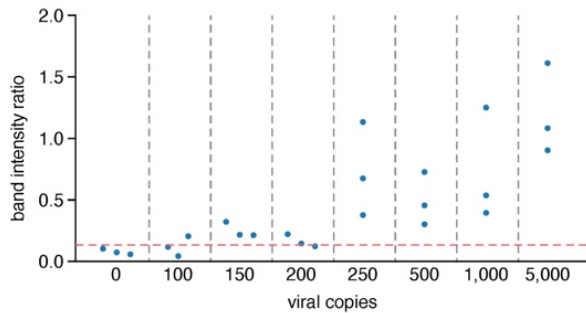**D**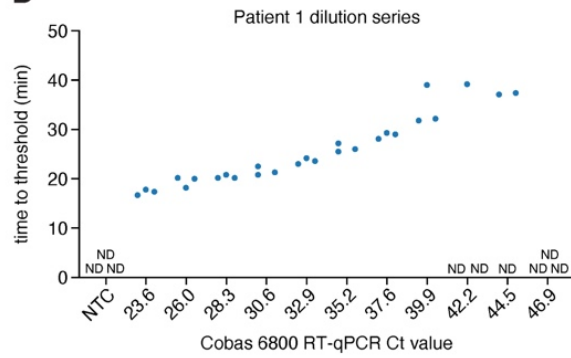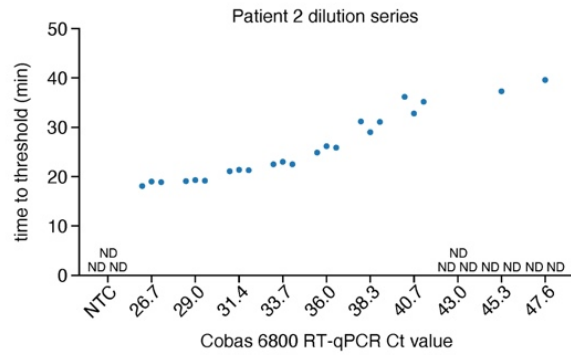**E**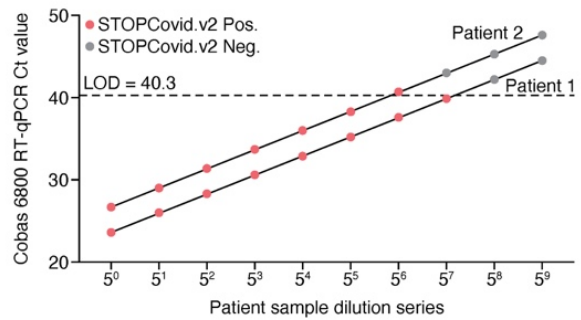

**Fig. S10 | Optimization of STOPCovid.v2 and limit of detection assessment.** **A**, Titration of AapCas12b and sgRNA concentrations for effects on STOPCovid.v2 performance. 500 copies of SARS-CoV-2 genomic standards were directly added to STOPCovid.v2 reactions without magnetic bead concentration. Two biological replicates were used for 500 copies and for 62 biological replicates were used for NTC (no template control) to evaluate sensitivity and specificity. Values represent endpoint fluorescence at 45 mins. **B**, Confirmation that lowering the AapCas12b and sgRNA concentrations to 31.3 nM does not affect the sensitivity of STOPCovid.v2. Different amounts of mock SARS-CoV-2 virus (SARS-CoV-2 RNA targets in a noninfectious viral coat) were added to extraction buffer containing lysis buffer and magnetic beads. Three biological replicates were used for 100, 250, or 500 copies and 87 biological replicates were used for 0 copies to evaluate sensitivity and specificity. Values represent endpoint fluorescence at 45 mins. **C**, Comparison of the limit of detection (LOD) for the standard CDC workflow (top) to STOPCovid.v2 (middle and bottom). SARS- CoV-2 virus-like particles (SARS-CoV-2 RNA targets in a noninfectious viral coat) and 1.25  $\mu$ g of human RNA were added to VTM or extraction buffer containing lysis buffer and magnetic beads. STOPCovid.v2 fluorescence readout (middle) was evaluated using time for the fluorescence signal to reach the classification threshold (see Supplementary Appendix Methods). STOPCovid.v2 lateral flow readout (bottom) was quantified and interpreted using a mobile phone application with the red dashed line indicating the threshold for classification. ND, not detected. **D**, Dilution series using two SARS-CoV-2 RNA positive patient nasopharyngeal (NP) swab viral transport medium (VTM) to estimate sensitivity of STOPCovid.v2. A swab was used to transfer 50  $\mu$ L of the sample into the extraction buffer. Ct values represent projected values for each 5-fold dilution in VTM. NTC, no template control. **E**, Estimation of sensitivity by averaging the highest Ct values that were STOPCovid.v2 positive in all 3 replicates for each patient.

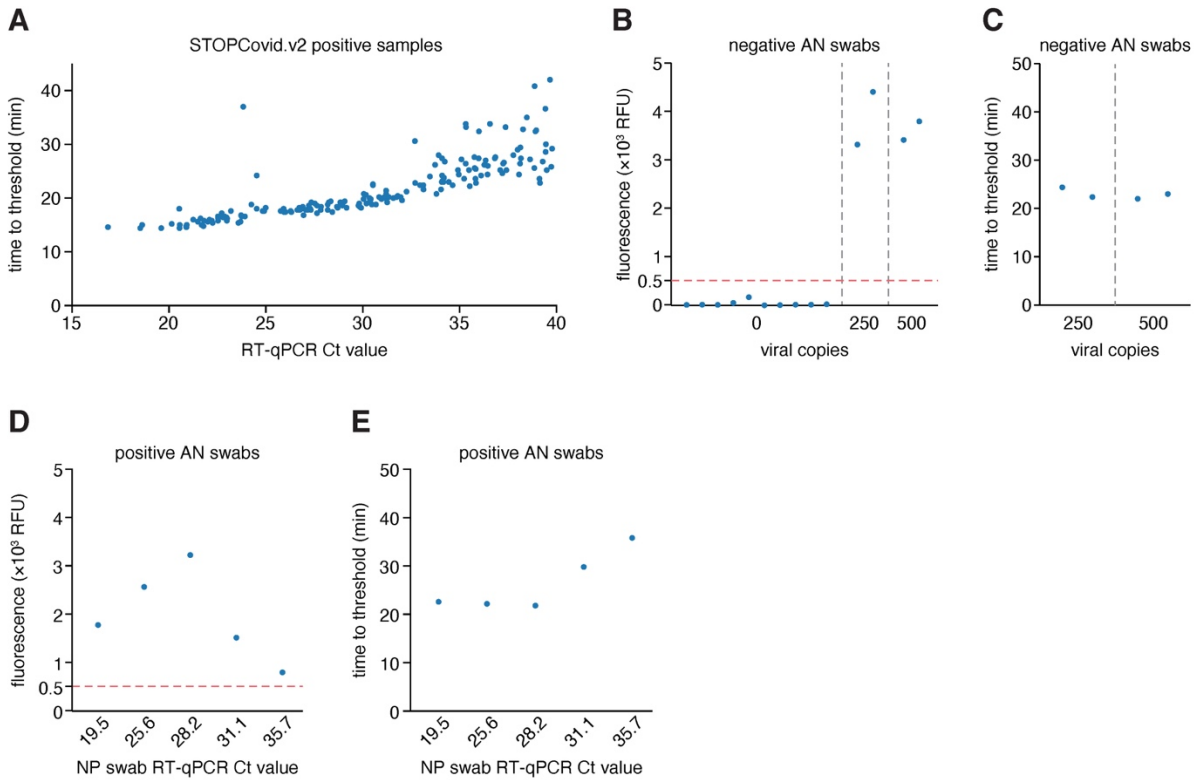

**Fig. S11 | Performance evaluation of STOPCovid.v2 using SARS-CoV-2 patient samples.** **A**, STOPCovid.v2 results for 202 SARS-CoV-2 positive patient nasopharyngeal (NP) swab viral transport medium (VTM) samples detected by fluorescence readout. A swab with 50  $\mu$ L of the sample was dipped into the extraction buffer. Ct values were determined using standard RT-qPCR workflows. Time to reach the fluorescence threshold for 188 STOPCovid.v2 positive samples is shown. **B-C**, STOPCovid.v2 results for SARS-CoV-2 negative patient anterior nasal (AN) swabs. Dry AN swabs with mock SARS-CoV-2 virus were dipped in extraction buffer. Data represents endpoint fluorescence (**B**) or time to fluorescence threshold (**C**). **D-E**, STOPCovid.v2 results for 5 SARS-CoV-2 positive patient dry AN swabs. Data represents endpoint fluorescence (**D**) or time to fluorescence threshold (**E**). Ct values represent respective NP swab RT-qPCR results.



**A**

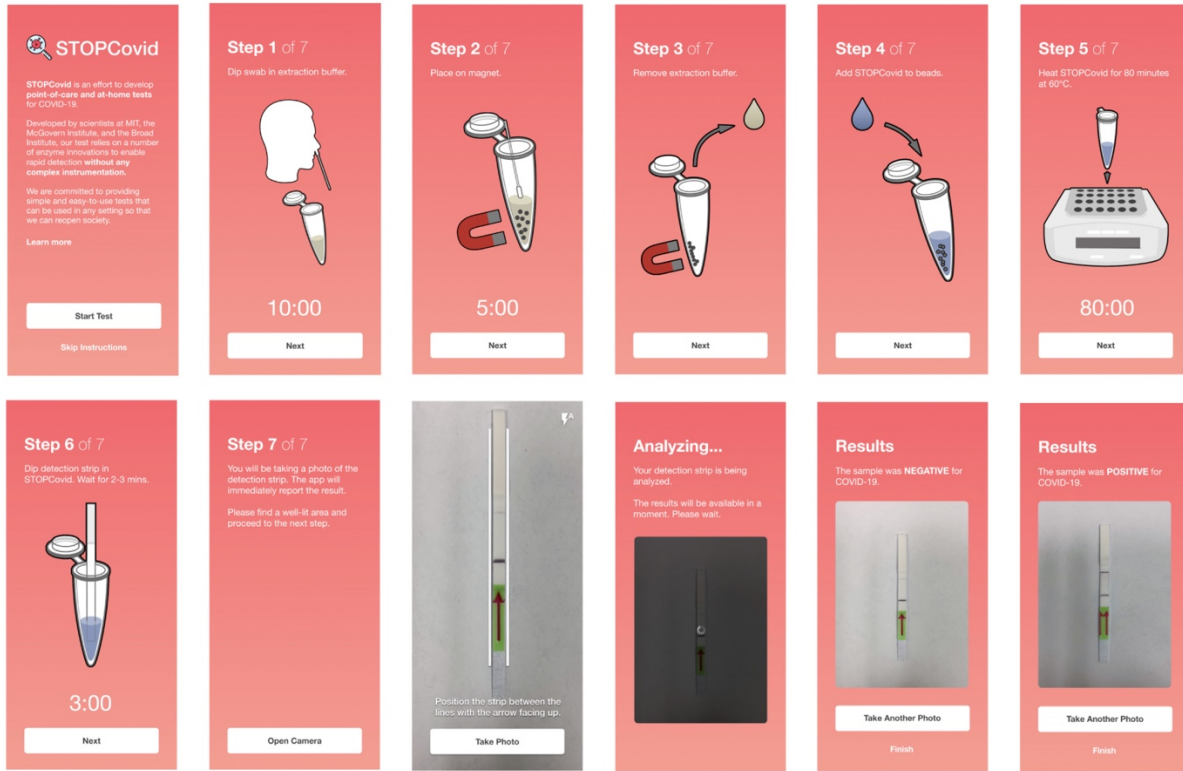

**B**

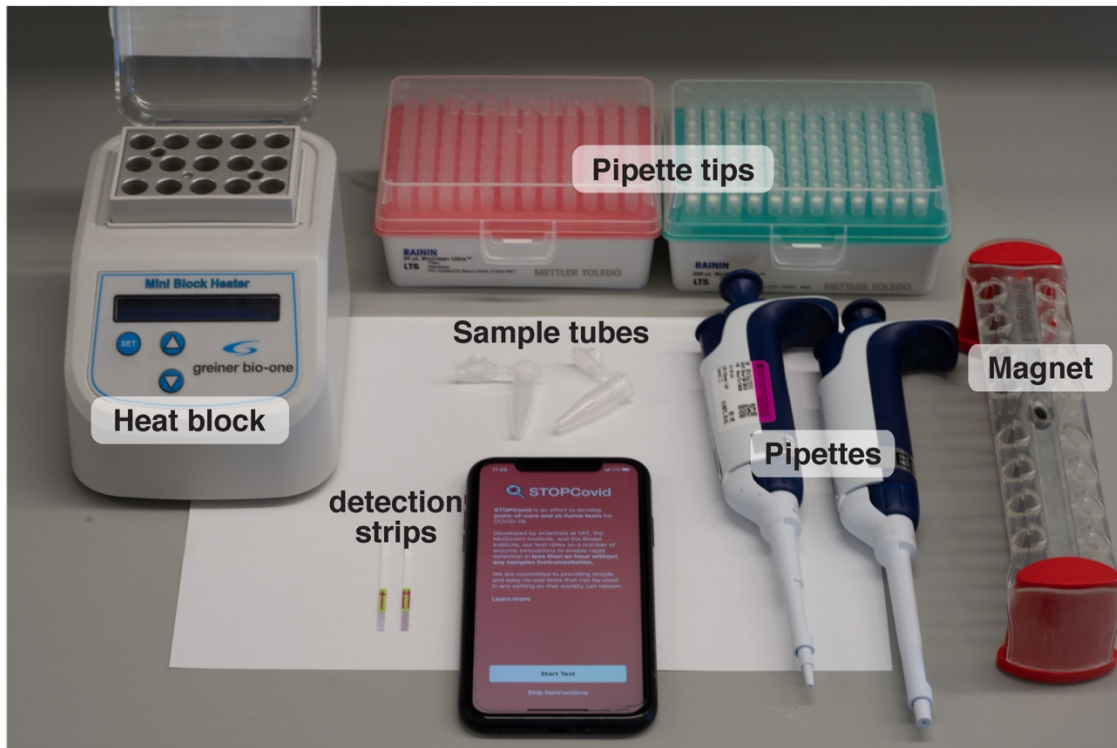



**Fig. S12 | Mobile phone application and equipment required for STOPCovid. A,** Wireframe of mobile phone application for interpreting the STOPCovid.v2 lateral flow readout. Application starts with the STOPCovid.v2 workflow followed by camera capture of a lateral flow strip image and result interpretation. **B,** Equipment and consumables needed for running STOPCovid.v2.

## Supplementary Tables

**Table S1 | Primer and probe sequences**

| <b>Name</b>  | <b>Sequence</b>                   |
|--------------|-----------------------------------|
| CDC N1 F     | GACCCCAAATCAGCGAAAT               |
| CDC N1 R     | TCTGGTACTGCCAGTTGAATCTG           |
| CDC N1 Probe | FAM-ACCCCGCATTACGTTTGGTGGACC-BHQ1 |
| CDC N2 F     | TTACAAACATTGGCCGCAAA              |
| CDC N2 R     | GCGCGACATTCCGAAGAA                |
| CDC N2 Probe | FAM-ACAATTTGCCCCAGCGCTTCAG-BHQ1   |
| RFP F        | ACTTGATGTTGACGTTGTAGG             |
| RFP R        | AGTTCATCTACAAGGTGAAGCT            |
| RFP Probe    | FAM-CCCCGTAATGCAGAAGAAGA-BHQ1     |

**Table S2 | LAMP target and primer set sequences**

| Name                                       | Sequence                                                                                                                                                                                                                                                                                                                                                                                    |
|--------------------------------------------|---------------------------------------------------------------------------------------------------------------------------------------------------------------------------------------------------------------------------------------------------------------------------------------------------------------------------------------------------------------------------------------------|
| ORF1ab Set 1 target RNA                    | CGCAACATTAACCAGTACCAGAGGTGAAAATACTCAATAA<br>TTTGGGTGTGGACATTGCTGCTAATACTGTGATCTGGGACTA<br>CAAAGAGATGCTCCAGCACATATATCTACTATTGGTGTTTG<br>TTCTATGACTGACATAGCCAAGAAACCAACTGAAACGATTTG<br>TGCACCACTCACTGTCTTTTTTGGATGGTAGAGTTGATGGTCA<br>AGTAGACTTATTTAGAAATGCCCGTAATGGTGTTCCTTATTAC                                                                                                             |
| ORF1ab Set 2 target RNA                    | AATTACAGAATAATGAGCTTAGTCCTGTTGCACTACGACAGA<br>TGTCTTGTGCTGCCGGTACTACACAACTGCTTGCCTGATG<br>ACAATGCGTTAGCTTACTACAACACAACAAAGGGAGGTAGG<br>TTTGTACTTGCCTGTTATCCGATTTACAGGATTTGAAATGG<br>GCTAGATTCCCTAAGAGTGATGGAAGTGGTACTATCTATACA                                                                                                                                                              |
| S Set 1 target RNA; S Set 2 target RNA     | AGATCCATCAAACCAAGCAAGAGGTCATTTATTGAAGATC<br>TACTTTTCAACAAAGTGACACTTGCAGATGCTGGCTTCATCA<br>ACAATATGGTGATTGCCTTGGTGATATTGCTGCTAGAGACC<br>TCATTTGTGCACAAAAGTTAACGGCCTTACTGTTTTGCCAC<br>CTTTGCTCACAGATGAAATGATTGCTCAATACTTCTGCAC<br>TGTTAGCGGGTACAATCACTTCTGGTTGGACCTTTGGTGCAG<br>GTGCTGCATTACAAATACCATTTGCTATGCAAATGGCTTATA<br>GGTTAATGGTATTGGAGTTACACAGAATGTTCTCTATGAGA<br>ACC                |
| N Set 1 target RNA; Zhang et al target RNA | CCCTCGAGGACAAGGCGTTCCAATTAACACCAATAGCAGTC<br>CAGATGACCAAATTGGCTACTACCGAAGAGCTACCAGACGA<br>ATTCGTGGTGGTGACGGTAAAATGAAAGATCTCAGTCCAAG<br>ATGGTATTTCTACTACCTAGGAAGTGGGCCAGAAGCTGGACT<br>TCCCTATGGTGCTAACAAAGACGGCATCATATGGGTTGCAAC<br>TGAGGGAGCCTTGAATACACCAAAGATCACATTGGCACCC<br>GCAATCCTGCTAACAATGCTGCAATCGTGCTA                                                                             |
| N Set 2 target RNA                         | TAAGAAATCTGCTGCTGAGGCTTCTAAGAAGCCTCGGCAAA<br>AACGTAAGTCCACTAAAGCATAACAATGTAACACAAGCTTTTCG<br>GCAGACGTGGTCCAGAACAAACCAAGGAAATTTTGGGGAC<br>CAGGAACTAATCAGACAAGGAACTGATTACAAACATTGGCC<br>GCAAATTGCACAATTTGCCCCAGCGCTTCAGCGTTCTTCGG<br>AATGTCGCGCATTGGCATGGAAGTCACACCTTCGGGAACGT<br>GGTTGACCTACACAGGTGCCATCAAATTGGATGACAAAGAT<br>CCAAATTTCAAAGATCAAGTCATTTTGGCTGAATAAGCATATT<br>GACGCATACAAAACA |

|                            |                                                                                                                                                                                                                                                                                                                                                       |
|----------------------------|-------------------------------------------------------------------------------------------------------------------------------------------------------------------------------------------------------------------------------------------------------------------------------------------------------------------------------------------------------|
| Broughten et al target RNA | TGCTGAGGCTTCTAAGAAGCCTCGGCAAAAACGTA CTGCCA CTAAAGCATAACAATGTAACACAAGCTTTCGGCAGACGTGGT CCAGAACAAACCCAAGGAAATTTGGGGACCAGGAACTAAT CAGACAAGGAACTGATTACAAACATTGGCCGCAAATTGCAC AATTTGCCCCAGCGCTTCAGCGTTCTTCGGAATGTCGCGCA TTGGCATGGAAGTCACACCTTCGGGAACGTGGTTGACCTACA CAGGTGCCATCAAATTGGATGACAAAGATCCAAATTTCAA GATCAAGTCATTTTGCTGAATAAGCATATTGACGCATACAAA ACA |
| ORF1ab Set 1 F3            | AACCAGTACCAGAGGTGAA                                                                                                                                                                                                                                                                                                                                   |
| ORF1ab Set 1 B3            | CACCATTACGGGCATTTCTA                                                                                                                                                                                                                                                                                                                                  |
| ORF1ab Set 1 FIP           | TGTGCTGGAGCATCTCTTTTGTGTTTGGGTGTGGACATTGC                                                                                                                                                                                                                                                                                                             |
| ORF1ab Set 1 BIP           | AGCCAAGAAACCAACTGAAACGCTACTTGACCATCAACTCT ACC                                                                                                                                                                                                                                                                                                         |
| ORF1ab Set 1 LoopF         | GTCCAGATCACAGTATTAGCA                                                                                                                                                                                                                                                                                                                                 |
| ORF1ab Set 1 LoopB         | TGTGCACCACTCACTGTC                                                                                                                                                                                                                                                                                                                                    |
| ORF1ab Set 2 F3            | TAATGAGCTTAGTCCTGTTGC                                                                                                                                                                                                                                                                                                                                 |
| ORF1ab Set 2 B3            | GTACCAGTTCCATCACTCTTAG                                                                                                                                                                                                                                                                                                                                |
| ORF1ab Set 2 FIP           | AGCTAACGCATTGTCATCAGTGACGACAGATGTCTTGTGC                                                                                                                                                                                                                                                                                                              |
| ORF1ab Set 2 BIP           | AACACAACAAAGGGAGGTAGGTTCTAGCCATTTCAAATCC TG                                                                                                                                                                                                                                                                                                           |
| ORF1ab Set 2 LoopF         | CAAGCAGTTTGTGTAGTACCG                                                                                                                                                                                                                                                                                                                                 |
| ORF1ab Set 2 LoopB         | TTGTA CTTGCACTGTTATCCGA                                                                                                                                                                                                                                                                                                                               |
| S Set 1 F3                 | AAACCAAGCAAGAGGTCATT                                                                                                                                                                                                                                                                                                                                  |
| S Set 1 B3                 | GTATTTGTAATGCAGCACCTG                                                                                                                                                                                                                                                                                                                                 |
| S Set 1 FIP                | TGCACAAATGAGGTCTCTAGCACAGATGCTGGCTTCATCAA                                                                                                                                                                                                                                                                                                             |
| S Set 1 BIP                | TTGCCACCTTTGCTCACAGATTCCAACCAGAAGTGATTGTAC                                                                                                                                                                                                                                                                                                            |
| S Set 1 LoopF              | CAATATCACCAAGGCAATCACC                                                                                                                                                                                                                                                                                                                                |
| S Set 1 LoopB              | TGATTGCTCAATACACTTCTGC                                                                                                                                                                                                                                                                                                                                |
| S Set 2 F3                 | CAGATGCTGGCTTCATCAA                                                                                                                                                                                                                                                                                                                                   |
| S Set 2 B3                 | GAGAACATTCTGTGTA ACTCCA                                                                                                                                                                                                                                                                                                                               |
| S Set 2 FIP                | TGGCAAACAGTAAGGCCGTTAATGGTGATTGCCTTGGTG                                                                                                                                                                                                                                                                                                               |
| S Set 2 BIP                | TTCTGCACTGTTAGCGGGTACGTATTTGTAATGCAGCACCTG                                                                                                                                                                                                                                                                                                            |
| S Set 2 LoopF              | AAATGAGGTCTCTAGCAGCAAT                                                                                                                                                                                                                                                                                                                                |
| S Set 2 LoopB              | AATCACTTCTGGTTGGACCTT                                                                                                                                                                                                                                                                                                                                 |
| N Set 1 F3                 | CAAGGCGTTCCAATTAACAC                                                                                                                                                                                                                                                                                                                                  |
| N Set 1 B3                 | GCAGCATTGTTAGCAGGA                                                                                                                                                                                                                                                                                                                                    |
| N Set 1 FIP                | ACCGTCACCACCACGAATTCCAATAGCAGTCCAGATGACC                                                                                                                                                                                                                                                                                                              |
| N Set 1 BIP                | CTAGGAACTGGGCCAGAAGCACCCATATGATGCCGTCT                                                                                                                                                                                                                                                                                                                |

|                  |                                            |
|------------------|--------------------------------------------|
| N Set 1 LoopF    | GCTCTTCGGTAGTAGCCAATT                      |
| N Set 1 LoopB    | GACTTCCCTATGGTGCTAACAA                     |
| N Set 2 F3       | GCTGCTGAGGCTTCTAAG                         |
| N Set 2 B3       | GCGTCAATATGCTTATTCAGC                      |
| N Set 2 FIP      | GCGGCCAATGTTTGTAAATCAGTAGACGTGGTCCAGAACAA  |
| N Set 2 BIP      | TCAGCGTTCTTCGGAATGTCGCTGTGTAGGTCAACCACG    |
| N Set 2 LoopF    | CCTTGTCTGATTAGTTCCTGGT                     |
| N Set 2 LoopB    | TGGCATGGAAGTCACACC                         |
| ACTB Set 1 F3    | AAGATGAGATTGGCATGGC                        |
| ACTB Set 1 B3    | GCAAGGGACTTCCTGTAAC                        |
| ACTB Set 1 FIP   | CTCCAACCGACTGCTGTCTTTGGCTTGACTCAGGATTT     |
| ACTB Set 1 BIP   | CCCAAAGTTCACAATGTGGCCGCATCTCATATTTGGAATGAC |
| ACTB Set 1 LoopF | ACCTTCACCGTTCCAGTT                         |
| ACTB Set 1 LoopB | GGACTTTGATTGCACATTGTTG                     |
| ACTB Set 2 F3    | ACTCTTCCAGCCTTCCTT                         |
| ACTB Set 2 B3    | GATCCACACGGAGTACTTG                        |
| ACTB Set 2 FIP   | TGTGTTGGCGTACAGGTCAACTACCTTCAACTCCATCATG   |
| ACTB Set 2 BIP   | CACCATGTACCCTGGCATTGATCTTGATCTTCATTGTGCTG  |
| ACTB Set 2 LoopF | GGATGTCCACGTCACACT                         |
| ACTB Set 2 LoopB | GACAGGATGCAGAAGGAGA                        |
| ACTB Set 3 F3    | GGCCGTCTTCCCCTCCAT                         |
| ACTB Set 3 B3    | CGCAGCTCATTGTAGAAGGT                       |
| ACTB Set 3 FIP   | TTGCTCTGGGCCTCGTCGCAGGCACCAGGGCGTGA        |
| ACTB Set 3 BIP   | TGAAGTACCCCATCGAGCACGGGTGGTGCCAGATTTTCTCCA |
| ACTB Set 3 LoopF | CCTTCTGACCCATGCCACCA                       |
| ACTB Set 3 LoopB | CATCGTCACCAACTGGGACGAC                     |
| ACTB Set 4 F3    | GCACCAGGGCGTGATG                           |
| ACTB Set 4 B3    | TCAGCAGCACGGGGTG                           |
| ACTB Set 4 FIP   | GAGGATGCCTCTCTTGCTCTGGGTGGGCATGGGTGAGAAG   |
| ACTB Set 4 BIP   | AGTACCCCATCGAGCACGGCACGCAGCTCATTGTAGAAGGT  |
| ACTB Set 4 LoopF | CCTCGTCGCCCACATAGGAATC                     |
| ACTB Set 4 LoopB | TCGTCACCAACTGGGACGACA                      |
| ACTB Set 5 F3    | TACGTTGCTATCCAGGCTGT                       |
| ACTB Set 5 B3    | AGTCAGGTCCCGGCCA                           |
| ACTB Set 5 FIP   | TGACCCCGTCACCGGAGTCCGCTATCCCTGTACGCCTCT    |
| ACTB Set 5 BIP   | CCCACACTGTGCCATCTACGCAGGTCCAGACGCAGGAT     |
| ACTB Set 5 LoopF | CGATGCCAGTGGTACGGCC                        |
| ACTB Set 5 LoopB | GGGGTATGCCCTCCCCAT                         |
| ACTB Set 6 F3    | GCTATCCCTGTACGCCTCT                        |

|                   |                                          |
|-------------------|------------------------------------------|
| ACTB Set 6 B3     | CGGTGAGGATCTTCATGAGG                     |
| ACTB Set 6 FIP    | AGATGGGCACAGTGTGGGTGGGCCGTACCACTGGCA     |
| ACTB Set 6 BIP    | GGGTATGCCCTCCCCATTTCAGTCAGGTCCCGGC       |
| ACTB Set 6 LoopF  | CGTCACCGGAGTCCATCACGA                    |
| ACTB Set 6 LoopB  | GCCATCCTGCGTCTGGACC                      |
| ACTB Set 7 F3     | GGGAAATCGTGC GTGACA                      |
| ACTB Set 7 B3     | GGCTGGAAGAGTGCCTCA                       |
| ACTB Set 7 FIP    | GGAAGCAGCCGTGGCCATCAAGGAGAAGCTGTGCTACGT  |
| ACTB Set 7 BIP    | TCCTCCCTGGAGAAGAGCTACGCCGCTCATTGCCAATGGT |
| ACTB Set 7 LoopF  | TTGCTCGAAGTCCAGGGCG                      |
| ACTB Set 7 LoopB  | NULL                                     |
| ACTB Set 8 F3     | AAGGAGAAGCTGTGCTACGT                     |
| ACTB Set 8 B3     | TGCCCAGGAAGGAAGGC                        |
| ACTB Set 8 FIP    | CGTAGCTCTTCTCCAGGGAGGAGCCCTGGACTTCGAGCA  |
| ACTB Set 8 BIP    | CCTGACGGCCAGGTCATCACCTGGAAGAGTGCCTCAGGG  |
| ACTB Set 8 LoopF  | AGCAGCCGTGGCCATCTC                       |
| ACTB Set 8 LoopB  | ATTGGCAATGAGCGGTTCCGC                    |
| ACTB Set 9 F3     | GGCATCCACGAAACTACCTT                     |
| ACTB Set 9 B3     | ACTTGCCTCAGGAGGAG                        |
| ACTB Set 9 FIP    | CCGCCAGACAGCACTGTGTTTCATGAAGTGTGACGTGGAC |
| ACTB Set 9 BIP    | CACCACCATGTACCCTGGCATTTCATTGTGCTGGGTGCC  |
| ACTB Set 9 LoopF  | GGCGTACAGGTCTTTGCGGAT                    |
| ACTB Set 9 LoopB  | TGCCGACAGGATGCAGAAGG                     |
| ACTB Set 10 F3    | ATGCAGAAGGAGATCACTGC                     |
| ACTB Set 10 B3    | TTTGC GGTGGACGATGGA                      |
| ACTB Set 10 FIP   | CACACGGAGTACTTGCCTCACTGGCACCCAGCACAATG   |
| ACTB Set 10 BIP   | CTCCATCCTGGCCTCGCTGTCGTCATACTCCTGCTTGCTG |
| ACTB Set 10 LoopF | NULL                                     |
| ACTB Set 10 LoopB | CCACCTTCCAGCAGATGTGGAT                   |
| GAPDH Set 1 F3    | AAAGGGTCATCATCTCTGC                      |
| GAPDH Set 1 B3    | ATGATGTTCTGGAGAGCC                       |
| GAPDH Set 1 FIP   | GCTAAGCAGTTGGTGGTGAACCATGAGAAGTATGACAAC  |
| GAPDH Set 1 BIP   | GGTATCGTGGAAGGACTCATCCATCCACAGTCTTCTGG   |
| GAPDH Set 1 LoopF | TTGCTGATGATCTTGAGGC                      |
| GAPDH Set 1 LoopB | CAGTCCATGCCATCACTG                       |
| GAPDH Set 2 F3    | ATGAGAAGTATGACAACAGCC                    |
| GAPDH Set 2 B3    | GATGATGTTCTGGAGAGCC                      |
| GAPDH Set 2 FIP   | TGTCATGGATGACCTTGGCAGATCATCAGCAATGCCTC   |
| GAPDH Set 2 BIP   | GGTATCGTGGAAGGACTCATGGCCATCCACAGTCTTCTG  |

|                   |                                                  |
|-------------------|--------------------------------------------------|
| GAPDH Set 2 LoopF | GCTAAGCAGTTGGTGGTG                               |
| GAPDH Set 2 LoopB | ACAGTCCATGCCATCACT                               |
| GAPDH Set 3 F3    | GTGAAGGTCGGAGTCAAC                               |
| GAPDH Set 3 B3    | CTCCATGGTGGTGAAGAC                               |
| GAPDH Set 3 FIP   | GGGTGGAATCATATTGGAACATAGTGGATATTGTTGCCATCA       |
| GAPDH Set 3 BIP   | CACCGTCAAGGCTGAGAAATCTCGCTCCTGGAAGAT             |
| GAPDH Set 3 LoopF | ACCATGTAGTTGAGGTCAATG                            |
| GAPDH Set 3 LoopB | GGAAGCTTGTCATCAATGGA                             |
| GAPDH Set 4 F3    | ACCATGAGAAGTATGACAACAG                           |
| GAPDH Set 4 B3    | GATGATGTTCTGGAGAGCC                              |
| GAPDH Set 4 FIP   | TGTCATGGATGACCTTGGCCTCAAGATCATCAGCAATGC          |
| GAPDH Set 4 BIP   | GGTATCGTGGAAGGACTCATGGCCATCCACAGTCTTCTG          |
| GAPDH Set 4 LoopF | GCTAAGCAGTTGGTGGTG                               |
| GAPDH Set 4 LoopB | ACAGTCCATGCCATCACT                               |
| GAPDH Set 5 F3    | GTGAAGGTCGGAGTCAAC                               |
| GAPDH Set 5 B3    | GACTCCACGACGTACTCA                               |
| GAPDH Set 5 FIP   | TGGGTGGAATCATATTGGAACAGGATATTGTTGCCATCAATG<br>AC |
| GAPDH Set 5 BIP   | ACCGTCAAGGCTGAGAACGATCTCGCTCCTGGAAGA             |
| GAPDH Set 5 LoopF | AACCATGTAGTTGAGGTCAATG                           |
| GAPDH Set 5 LoopB | GGAAGCTTGTCATCAATGGAA                            |
| GAPDH Set 6 F3    | TGGTATCGTGGAAGGACTCA                             |
| GAPDH Set 6 B3    | CGTTCAGCTCAGGGATGAC                              |
| GAPDH Set 6 FIP   | ACGCCACAGTTTCCCGGAGGTGACCACAGTCCATGCCA           |
| GAPDH Set 6 BIP   | CGCGGGGCTCTCCAGAACACTTGCCCACAGCCTTGG             |
| GAPDH Set 6 LoopF | ACAGTCTTCTGGGTGGCAGTGA                           |
| GAPDH Set 6 LoopB | CATCCCTGCCTCTACTGGCGC                            |
| GAPDH Set 7 F3    | TCGTGGAAGGACTCATGACC                             |
| GAPDH Set 7 B3    | CGTTCAGCTCAGGGATGAC                              |
| GAPDH Set 7 FIP   | ACGCCACAGTTTCCCGGAGGACAGTCCATGCCATCACTGC         |
| GAPDH Set 7 BIP   | CGCGGGGCTCTCCAGAACACTTGCCCACAGCCTTGG             |
| GAPDH Set 7 LoopF | GCCATCCACAGTCTTCTGGGTG                           |
| GAPDH Set 7 LoopB | CATCCCTGCCTCTACTGGCGC                            |
| GAPDH Set 8 F3    | GACCACAGTCCATGCCATC                              |
| GAPDH Set 8 B3    | GGCCATGCCAGTGAGCT                                |
| GAPDH Set 8 FIP   | TGTTCTGGAGAGCCCCGCGACTGCCACCCAGAAGACT            |
| GAPDH Set 8 BIP   | CATCCCTGCCTCTACTGGCGCTCCCGTTCAGCTCAGGGAT         |
| GAPDH Set 8 LoopF | ACGCCACAGTTTCCCGGAGG                             |
| GAPDH Set 8 LoopB | TGCCAAGGCTGTGGGCAA                               |

|                   |                                           |
|-------------------|-------------------------------------------|
| GAPDH Set 9 F3    | GCGCTGCCAAGGCTGT                          |
| GAPDH Set 9 B3    | CCCAGGATGCCCTTGAGG                        |
| GAPDH Set 9 FIP   | GTGGGGACACGGAAGGCCAGGGCAAGGTCATCCCTGA     |
| GAPDH Set 9 BIP   | TGCCAACGTGTCAGTGGTGGACTGCTTCACCACCTTCTTGA |
| GAPDH Set 9 LoopF | CCAGTGAGCTTCCCGTTCAGC                     |
| GAPDH Set 9 LoopB | TGCCGTCTAGAAAAACCTGCCA                    |



**Table S3 | Cas12b Protein Sequences**

| <b>Protein</b> | <b>Sequence</b>                                                                                                                                                                                                                                                                                                                                                                                                                                                                                                                                                                                                                                                                                                                                                                                                                                                                                                                                                                                                                                                                                                                                                                                                                                                 |
|----------------|-----------------------------------------------------------------------------------------------------------------------------------------------------------------------------------------------------------------------------------------------------------------------------------------------------------------------------------------------------------------------------------------------------------------------------------------------------------------------------------------------------------------------------------------------------------------------------------------------------------------------------------------------------------------------------------------------------------------------------------------------------------------------------------------------------------------------------------------------------------------------------------------------------------------------------------------------------------------------------------------------------------------------------------------------------------------------------------------------------------------------------------------------------------------------------------------------------------------------------------------------------------------|
| AacCas<br>12b  | MAVKSIKVKLRLDDMPEIRAGLWKLHKEVNAGVRYYTEWLSLLRQENLYR<br>RSPNGDGEQECDKTAEECKAELLERLRARQVENGHRGPAGSDDELLQLAR<br>QLYELLVPQAIGAKGDAQIARKFLSPLADKDAVGGLGIKAGNKPRWVR<br>MREAGEPGWEEKEKAETRKSADRTADVLRALADDFGLKPLMRVYTDSEMS<br>SVEWKPLRKGQAVRTWDRDMFQQAIERMMSWESWNQRVGQEYAKLVEQ<br>KNRFEQKNFVVGQEHVHLVNQLQQDMKEASPGLESKEQTAHYVTGRALRG<br>SDKVFEKWGKLPDAPFDLYDAEIKNVQRRNTRRFSGHDLFAKLAEPEYQA<br>LWREDASFLTRYAVYNSILRKLNHAKMFATFTLPDATAHPIWTRFDKLGGN<br>LHQYTFLFNEFGERRHAIRFHKLKLVENGVAEVDDVTVPISMSEQLDNLLP<br>RDPNEPIALYFRDYGAEQHFTGEFGGAKIQCRDQLAHMHRRRGARDVYL<br>NVSVRVQSQSEARGERRPPYAAVFRLVGDNHRAFVHFDKLSDYLAEHPDD<br>GKLGSEGLLSGLRVMSVDLGLRTSASISVFRVARKDELKPNKSKGRVPFFFPK<br>GNDNLVAVHERSQLLKLPGETESKDLRAIREERQRTLRLQRTQLAYLRLV<br>RCGSEDVGRRERSWAKLIEQPVDAAANHMTDPDWREAFENELQKLKSLHGICS<br>DKEWMDAVYESVRRVWRHMGKQVRDWRKDVRSGERP KIRGYAKDVVG<br>GNSIEQIEYLERQYKFLKSWSFFGKVSGQVIRAEKGSRFAITLREHIDHAKED<br>RLKKLADRIIMEALGYVYALDERGKKGKVVAKYPPCQLILLEELSEYQFNND<br>RPPSENNQLMQWVSHRGVFQELINQAQVHDLLVGTMYAAFSSRFDARTGAP<br>GIRCRRV PARCTQEHNPEFPFWLNFVVEHTLDACPLRADDLIPTGEGEIF<br>VSPFSAEEGDFHQIHADLNAAQNQQRLWSDFDISQIRLRCDWGEVDGELV<br>LIPRLTGKRTADSYSNKVFYTNVTGTYERERERGKKRRKVFAQEKLSEEEAE<br>LLVEADEAREKSVVLMRDPGSIINRGNWTRQKEFWSMVNQRIEGLVKQIR<br>SRVPLQDSACENTGDI* |
| AapCas<br>12b  | MAVKSMKVKLRLDNMPEIRAGLWKLHTEVNAGVRYYTEWLSLLRQENLY<br>RRSPNGDGEQECYKTAEECKAELLERLRARQVENGHCGPAGSDDELLQLA<br>RQLYELLVPQAIGAKGDAQIARKFLSPLADKDAVGGLGIKAGNKPRWV<br>RMREAGEPGWEEKAKAEARKSTDRTADVLRALADDFGLKPLMRVYTDSD<br>MSSVQWKPLRKGQAVRTWDRDMFQQAIERMMSWESWNQRVGEAYAKLV<br>EQKS RFEQKNFVVGQEHVQLVNQLQQDMKEASHGLESKEQTAHYLTGRAL<br>RGSDKVF EKWEKLPDAPFDLYDTEIKNVQRRNTRRFSGHDLFAKLAEPKY<br>QALWREDASFLTRYAVYNSIVRKLNHAKMFATFTLPDATAHPIWTRFDKLG<br>GNLHQYTFLFNEFGGRHAIRFQKLLTVEDGVAKEVDDVTVPISM SAQLDD<br>LLPRDPHELVALYFQDYGAEQHLAGEFGGAKIQYRRDQLNHLHARRGARD<br>VYLNLSVRVQSQSEARGERRPPYAAVFRLVGDNHRAFVHFDKLSDYLAEHP<br>DDGKLGSEGLLSGLRVMSVDLGLRTSASISVFRVARKDELKPNSEGRVPFCF<br>PIEGNENLVAHERSQLLKLPGETESKDLRAIREERQRTLRLQRTQLAYLRL<br>LVRCGSEDVGRRERSWAKLIEQPM DANQMTPDWREAFED ELQKLKSLYGI<br>CGDREWTEAVYESVRRVWRHMGKQVRDWRKDVRSGERP KIRGYQKDVV<br>GGNSIEQIEYLERQYKFLKSWSFFGKVSGQVIRAEKGSRFAITLREHIDHAKE<br>DRLKKLADRIIMEALGYVYALDDERGKKGKVVAKYPPCQLILLEELSEYQFN<br>NDRPPSENNQLMQWVSHRGVFQELLNQAQVHDLLVGTMYAAFSSRFDARTG<br>APGIRCRRV PARCAREQNPEFPFWLNFVAEHKLDGCPLRADDLIPTGEG<br>EFFVSPFSAEEGDFHQIHADLNAAQNQQRLWSDFDISQIRLRCDWGEVDGE                                                                                                                                  |

|                                                                                                                                                      |
|------------------------------------------------------------------------------------------------------------------------------------------------------|
| PVLIPRTTGKRTADSYGNKVFYTKTGVTYYERERGGKKRRKVFAQEELSEE<br>AELLVEADEAREKSVVLMRDPSGIINRGDWTRQKEFWSMVNQRIEGLVK<br>QIRSRVRLQESACENTGDI*AAALEARKEAELAAATAEQ* |
|------------------------------------------------------------------------------------------------------------------------------------------------------|

**Table S4 | Cas12b spacer sequences**

| <b>Name</b>              | <b>sgRNA Sequence</b>                                                                                                   |
|--------------------------|-------------------------------------------------------------------------------------------------------------------------|
| Orflab Set 1<br>Guide 1  | GTCTAGAGGACAGAATTTTTCAACGGGTGTGCCAATGGCCACTTTCC<br>AGGTGGCAAAGCCCGTTGAGCTTCTCAAATCTGAGAAGTGGCACTA<br>GTCCCAGATCACAGTATT |
| Orflab Set 1<br>Guide 2  | GTCTAGAGGACAGAATTTTTCAACGGGTGTGCCAATGGCCACTTTCC<br>AGGTGGCAAAGCCCGTTGAGCTTCTCAAATCTGAGAAGTGGCACGT<br>AGTCCCAGATCACAGTAT |
| Orflab Set 1<br>Guide 3  | GTCTAGAGGACAGAATTTTTCAACGGGTGTGCCAATGGCCACTTTCC<br>AGGTGGCAAAGCCCGTTGAGCTTCTCAAATCTGAGAAGTGGCACTG<br>TAGTCCCAGATCACAGTA |
| Orflab Set 1<br>Guide 4  | GTCTAGAGGACAGAATTTTTCAACGGGTGTGCCAATGGCCACTTTCC<br>AGGTGGCAAAGCCCGTTGAGCTTCTCAAATCTGAGAAGTGGCACCT<br>GCTAATACTGTGATCTGG |
| Orflab Set 1<br>Guide 5  | GTCTAGAGGACAGAATTTTTCAACGGGTGTGCCAATGGCCACTTTCC<br>AGGTGGCAAAGCCCGTTGAGCTTCTCAAATCTGAGAAGTGGCACGC<br>TATGTCAGTCATAGAACA |
| Orflab Set 1<br>Guide 6  | GTCTAGAGGACAGAATTTTTCAACGGGTGTGCCAATGGCCACTTTCC<br>AGGTGGCAAAGCCCGTTGAGCTTCTCAAATCTGAGAAGTGGCACTT<br>GGCTATGTCAGTCATAGA |
| Orflab Set 1<br>Guide 7  | GTCTAGAGGACAGAATTTTTCAACGGGTGTGCCAATGGCCACTTTCC<br>AGGTGGCAAAGCCCGTTGAGCTTCTCAAATCTGAGAAGTGGCACCT<br>TGGCTATGTCAGTCATAG |
| Orflab Set 1<br>Guide 8  | GTCTAGAGGACAGAATTTTTCAACGGGTGTGCCAATGGCCACTTTCC<br>AGGTGGCAAAGCCCGTTGAGCTTCTCAAATCTGAGAAGTGGCACGT<br>TTCTTGGCTATGTCAGTC |
| Orflab Set 1<br>Guide 9  | GTCTAGAGGACAGAATTTTTCAACGGGTGTGCCAATGGCCACTTTCC<br>AGGTGGCAAAGCCCGTTGAGCTTCTCAAATCTGAGAAGTGGCACGT<br>GTTTGTCTATGACTGAC  |
| Orflab Set 1<br>Guide 10 | GTCTAGAGGACAGAATTTTTCAACGGGTGTGCCAATGGCCACTTTCC<br>AGGTGGCAAAGCCCGTTGAGCTTCTCAAATCTGAGAAGTGGCACAG<br>TTGGTTTCTTGGCTATGT |
| Orflab Set 1<br>Guide 11 | GTCTAGAGGACAGAATTTTTCAACGGGTGTGCCAATGGCCACTTTCC<br>AGGTGGCAAAGCCCGTTGAGCTTCTCAAATCTGAGAAGTGGCACCA<br>GTTGGTTTCTTGGCTATG |
| Orflab Set 1<br>Guide 12 | GTCTAGAGGACAGAATTTTTCAACGGGTGTGCCAATGGCCACTTTCC<br>AGGTGGCAAAGCCCGTTGAGCTTCTCAAATCTGAGAAGTGGCACGT<br>TCTATGACTGACATAGCC |
| Orflab Set 1<br>Guide 13 | GTCTAGAGGACAGAATTTTTCAACGGGTGTGCCAATGGCCACTTTCC<br>AGGTGGCAAAGCCCGTTGAGCTTCTCAAATCTGAGAAGTGGCACTT<br>CTATGACTGACATAGCCA |
| Orflab Set 1<br>Guide 14 | GTCTAGAGGACAGAATTTTTCAACGGGTGTGCCAATGGCCACTTTCC<br>AGGTGGCAAAGCCCGTTGAGCTTCTCAAATCTGAGAAGTGGCACTA<br>TACTGACATAGCCAAGA  |

|                          |                                                                                                                         |
|--------------------------|-------------------------------------------------------------------------------------------------------------------------|
| Orflab Set 1<br>Guide 15 | GTCTAGAGGACAGAATTTTTCAACGGGTGTGCCAATGGCCACTTTCC<br>AGGTGGCAAAGCCCGTTGAGCTTCTCAAATCTGAGAAGTGGCACGT<br>GCACCACTCACTGTCTTT |
| Orflab Set 1<br>Guide 16 | GTCTAGAGGACAGAATTTTTCAACGGGTGTGCCAATGGCCACTTTCC<br>AGGTGGCAAAGCCCGTTGAGCTTCTCAAATCTGAGAAGTGGCACTG<br>CACCACTCACTGTCTTTT |
| S Set 1<br>Guide 1       | GTCTAGAGGACAGAATTTTTCAACGGGTGTGCCAATGGCCACTTTCC<br>AGGTGGCAAAGCCCGTTGAGCTTCTCAAATCTGAGAAGTGGCACTG<br>CACAAATGAGGTCTCTAG |
| S Set 1<br>Guide 2       | GTCTAGAGGACAGAATTTTTCAACGGGTGTGCCAATGGCCACTTTCC<br>AGGTGGCAAAGCCCGTTGAGCTTCTCAAATCTGAGAAGTGGCACCC<br>TTGGTGATATTGCTGCTA |
| S Set 1<br>Guide 3       | GTCTAGAGGACAGAATTTTTCAACGGGTGTGCCAATGGCCACTTTCC<br>AGGTGGCAAAGCCCGTTGAGCTTCTCAAATCTGAGAAGTGGCACGT<br>GCACAAATGAGGTCTCTA |
| S Set 1<br>Guide 4       | GTCTAGAGGACAGAATTTTTCAACGGGTGTGCCAATGGCCACTTTCC<br>AGGTGGCAAAGCCCGTTGAGCTTCTCAAATCTGAGAAGTGGCACTG<br>TGCACAAATGAGGTCTCT |
| S Set 1<br>Guide 5       | GTCTAGAGGACAGAATTTTTCAACGGGTGTGCCAATGGCCACTTTCC<br>AGGTGGCAAAGCCCGTTGAGCTTCTCAAATCTGAGAAGTGGCACAA<br>CTTTTGTGCACAAATGAG |
| S Set 1<br>Guide 6       | GTCTAGAGGACAGAATTTTTCAACGGGTGTGCCAATGGCCACTTTCC<br>AGGTGGCAAAGCCCGTTGAGCTTCTCAAATCTGAGAAGTGGCACGT<br>GCACAAAAGTTTAACGGC |
| S Set 1<br>Guide 7       | GTCTAGAGGACAGAATTTTTCAACGGGTGTGCCAATGGCCACTTTCC<br>AGGTGGCAAAGCCCGTTGAGCTTCTCAAATCTGAGAAGTGGCACTG<br>CACAAAAGTTTAACGGCC |
| S Set 1<br>Guide 8       | GTCTAGAGGACAGAATTTTTCAACGGGTGTGCCAATGGCCACTTTCC<br>AGGTGGCAAAGCCCGTTGAGCTTCTCAAATCTGAGAAGTGGCACAA<br>CGGCCTTACTGTTTTGCC |
| S Set 1<br>Guide 9       | GTCTAGAGGACAGAATTTTTCAACGGGTGTGCCAATGGCCACTTTCC<br>AGGTGGCAAAGCCCGTTGAGCTTCTCAAATCTGAGAAGTGGCACAC<br>GGCCTTACTGTTTTGCCA |
| S Set 1<br>Guide 10      | GTCTAGAGGACAGAATTTTTCAACGGGTGTGCCAATGGCCACTTTCC<br>AGGTGGCAAAGCCCGTTGAGCTTCTCAAATCTGAGAAGTGGCACCT<br>GTTTTGCCACCTTTGCTC |
| S Set 1<br>Guide 11      | GTCTAGAGGACAGAATTTTTCAACGGGTGTGCCAATGGCCACTTTCC<br>AGGTGGCAAAGCCCGTTGAGCTTCTCAAATCTGAGAAGTGGCACTG<br>CCACCTTTGCTCACAGAT |
| S Set 1<br>Guide 12      | GTCTAGAGGACAGAATTTTTCAACGGGTGTGCCAATGGCCACTTTCC<br>AGGTGGCAAAGCCCGTTGAGCTTCTCAAATCTGAGAAGTGGCACGC<br>CACCTTTGCTCACAGATG |
| S Set 1<br>Guide 13      | GTCTAGAGGACAGAATTTTTCAACGGGTGTGCCAATGGCCACTTTCC<br>AGGTGGCAAAGCCCGTTGAGCTTCTCAAATCTGAGAAGTGGCACCC<br>ACCTTTGCTCACAGATGA |

|                     |                                                                                                                         |
|---------------------|-------------------------------------------------------------------------------------------------------------------------|
| S Set 1<br>Guide 14 | GTCTAGAGGACAGAATTTTTCAACGGGTGTGCCAATGGCCACTTTCC<br>AGGTGGCAAAGCCCGTTGAGCTTCTCAAATCTGAGAAGTGGCACGC<br>TCACAGATGAAATGATTG |
| S Set 1<br>Guide 15 | GTCTAGAGGACAGAATTTTTCAACGGGTGTGCCAATGGCCACTTTCC<br>AGGTGGCAAAGCCCGTTGAGCTTCTCAAATCTGAGAAGTGGCACCT<br>CACAGATGAAATGATTG  |
| N Set 1<br>Guide 1  | GTCTAGAGGACAGAATTTTTCAACGGGTGTGCCAATGGCCACTTTCC<br>AGGTGGCAAAGCCCGTTGAGCTTCTCAAATCTGAGAAGTGGCACGT<br>CTGGTAGCTCTTCGGTAG |
| N Set 1<br>Guide 2  | GTCTAGAGGACAGAATTTTTCAACGGGTGTGCCAATGGCCACTTTCC<br>AGGTGGCAAAGCCCGTTGAGCTTCTCAAATCTGAGAAGTGGCACCC<br>GTCACCACCACGAATTCG |
| N Set 1<br>Guide 3  | GTCTAGAGGACAGAATTTTTCAACGGGTGTGCCAATGGCCACTTTCC<br>AGGTGGCAAAGCCCGTTGAGCTTCTCAAATCTGAGAAGTGGCACAC<br>CGTCACCACCACGAATTC |
| N Set 1<br>Guide 4  | GTCTAGAGGACAGAATTTTTCAACGGGTGTGCCAATGGCCACTTTCC<br>AGGTGGCAAAGCCCGTTGAGCTTCTCAAATCTGAGAAGTGGCACTA<br>CCGTCACCACCACGAATT |
| N Set 1<br>Guide 5  | GTCTAGAGGACAGAATTTTTCAACGGGTGTGCCAATGGCCACTTTCC<br>AGGTGGCAAAGCCCGTTGAGCTTCTCAAATCTGAGAAGTGGCACAT<br>TTTACCGTCACCACCACG |
| N Set 1<br>Guide 6  | GTCTAGAGGACAGAATTTTTCAACGGGTGTGCCAATGGCCACTTTCC<br>AGGTGGCAAAGCCCGTTGAGCTTCTCAAATCTGAGAAGTGGCACCA<br>TTTACCGTCACCACCAC  |
| N Set 1<br>Guide 7  | GTCTAGAGGACAGAATTTTTCAACGGGTGTGCCAATGGCCACTTTCC<br>AGGTGGCAAAGCCCGTTGAGCTTCTCAAATCTGAGAAGTGGCACGA<br>CTGAGATCTTTCATTTA  |
| N Set 1<br>Guide 8  | GTCTAGAGGACAGAATTTTTCAACGGGTGTGCCAATGGCCACTTTCC<br>AGGTGGCAAAGCCCGTTGAGCTTCTCAAATCTGAGAAGTGGCACGT<br>GGTGGTGACGGTAAAATG |
| N Set 1<br>Guide 9  | GTCTAGAGGACAGAATTTTTCAACGGGTGTGCCAATGGCCACTTTCC<br>AGGTGGCAAAGCCCGTTGAGCTTCTCAAATCTGAGAAGTGGCACCT<br>AGGTAGTAGAAATACCAT |
| N Set 1<br>Guide 10 | GTCTAGAGGACAGAATTTTTCAACGGGTGTGCCAATGGCCACTTTCC<br>AGGTGGCAAAGCCCGTTGAGCTTCTCAAATCTGAGAAGTGGCACTG<br>GCCAGTTCCTAGGTAGT  |
| N Set 1<br>Guide 11 | GTCTAGAGGACAGAATTTTTCAACGGGTGTGCCAATGGCCACTTTCC<br>AGGTGGCAAAGCCCGTTGAGCTTCTCAAATCTGAGAAGTGGCACCT<br>ACTACCTAGGAACTGGGC |
| N Set 1<br>Guide 12 | GTCTAGAGGACAGAATTTTTCAACGGGTGTGCCAATGGCCACTTTCC<br>AGGTGGCAAAGCCCGTTGAGCTTCTCAAATCTGAGAAGTGGCACTA<br>CTACCTAGGAACTGGGCC |
| N Set 2<br>Guide 1  | GTCTAGAGGACAGAATTTTTCAACGGGTGTGCCAATGGCCACTTTCC<br>AGGTGGCAAAGCCCGTTGAGCTTCTCAAATCTGAGAAGTGGCACCT<br>GGTCCCCAAAATTCCTT  |

|                     |                                                                                                                         |
|---------------------|-------------------------------------------------------------------------------------------------------------------------|
| N Set 2<br>Guide 2  | GTCTAGAGGACAGAATTTTTCAACGGGTGTGCCAATGGCCACTTTCC<br>AGGTGGCAAAGCCCGTTGAGCTTCTCAAATCTGAGAAGTGGCACGT<br>TCCTGGTCCCCAAAATT  |
| N Set 2<br>Guide 3  | GTCTAGAGGACAGAATTTTTCAACGGGTGTGCCAATGGCCACTTTCC<br>AGGTGGCAAAGCCCGTTGAGCTTCTCAAATCTGAGAAGTGGCACTC<br>TGATTAGTTCCTGGTCCC |
| N Set 2<br>Guide 4  | GTCTAGAGGACAGAATTTTTCAACGGGTGTGCCAATGGCCACTTTCC<br>AGGTGGCAAAGCCCGTTGAGCTTCTCAAATCTGAGAAGTGGCACCT<br>TGCTGATTAGTTCCTGG  |
| N Set 2<br>Guide 5  | GTCTAGAGGACAGAATTTTTCAACGGGTGTGCCAATGGCCACTTTCC<br>AGGTGGCAAAGCCCGTTGAGCTTCTCAAATCTGAGAAGTGGCACTA<br>ATCAGTTCCTTGTCTGAT |
| N Set 2<br>Guide 6  | GTCTAGAGGACAGAATTTTTCAACGGGTGTGCCAATGGCCACTTTCC<br>AGGTGGCAAAGCCCGTTGAGCTTCTCAAATCTGAGAAGTGGCACGT<br>AATCAGTTCCTTGTCTGA |
| N Set 2<br>Guide 7  | GTCTAGAGGACAGAATTTTTCAACGGGTGTGCCAATGGCCACTTTCC<br>AGGTGGCAAAGCCCGTTGAGCTTCTCAAATCTGAGAAGTGGCACCG<br>GCCAATGTTTGTAATCAG |
| N Set 2<br>Guide 8  | GTCTAGAGGACAGAATTTTTCAACGGGTGTGCCAATGGCCACTTTCC<br>AGGTGGCAAAGCCCGTTGAGCTTCTCAAATCTGAGAAGTGGCACGC<br>GGCCAATGTTTGTAATCA |
| N Set 2<br>Guide 9  | GTCTAGAGGACAGAATTTTTCAACGGGTGTGCCAATGGCCACTTTCC<br>AGGTGGCAAAGCCCGTTGAGCTTCTCAAATCTGAGAAGTGGCACTG<br>CAATTTGCGGCCAATGTT |
| N Set 2<br>Guide 10 | GTCTAGAGGACAGAATTTTTCAACGGGTGTGCCAATGGCCACTTTCC<br>AGGTGGCAAAGCCCGTTGAGCTTCTCAAATCTGAGAAGTGGCACGC<br>CGCAAATTGCACAATTG  |
| N Set 2<br>Guide 11 | GTCTAGAGGACAGAATTTTTCAACGGGTGTGCCAATGGCCACTTTCC<br>AGGTGGCAAAGCCCGTTGAGCTTCTCAAATCTGAGAAGTGGCACCG<br>AAGAACGCTGAAGCGCTG |
| N Set 2<br>Guide 12 | GTCTAGAGGACAGAATTTTTCAACGGGTGTGCCAATGGCCACTTTCC<br>AGGTGGCAAAGCCCGTTGAGCTTCTCAAATCTGAGAAGTGGCACCA<br>CAATTTGCCCCAGCGCT  |
| N Set 2<br>Guide 13 | GTCTAGAGGACAGAATTTTTCAACGGGTGTGCCAATGGCCACTTTCC<br>AGGTGGCAAAGCCCGTTGAGCTTCTCAAATCTGAGAAGTGGCACGC<br>CCCAGCGCTTCAGCGTT  |
| N Set 2<br>Guide 14 | GTCTAGAGGACAGAATTTTTCAACGGGTGTGCCAATGGCCACTTTCC<br>AGGTGGCAAAGCCCGTTGAGCTTCTCAAATCTGAGAAGTGGCACCC<br>CCCAGCGCTTCAGCGTTC |
| N Set 2<br>Guide 15 | GTCTAGAGGACAGAATTTTTCAACGGGTGTGCCAATGGCCACTTTCC<br>AGGTGGCAAAGCCCGTTGAGCTTCTCAAATCTGAGAAGTGGCACAG<br>CGTTCTTCGGAATGTCGC |
| N Set 2<br>Guide 16 | GTCTAGAGGACAGAATTTTTCAACGGGTGTGCCAATGGCCACTTTCC<br>AGGTGGCAAAGCCCGTTGAGCTTCTCAAATCTGAGAAGTGGCACTT<br>CGGAATGTCGCGCATTGG |

|                     |                                                                                                                         |
|---------------------|-------------------------------------------------------------------------------------------------------------------------|
| N Set 2<br>Guide 17 | GTCTAGAGGACAGAATTTTTCAACGGGTGTGCCAATGGCCACTTTCC<br>AGGTGGCAAAGCCCGTTGAGCTTCTCAAATCTGAGAAGTGGCACGG<br>AATGTCGCGCATTGGCAT |
| N Set 2<br>Guide 18 | GTCTAGAGGACAGAATTTTTCAACGGGTGTGCCAATGGCCACTTTCC<br>AGGTGGCAAAGCCCGTTGAGCTTCTCAAATCTGAGAAGTGGCACGC<br>ATGGAAGTCACACCTTCG |

## **Acknowledgements**

We thank R. Shan of Quintara for oligo synthesis; K. Holden, A. Kadina, and J. Walker of Synthego for guide RNA synthesis; A. Farina for assistance with protein purification; and A. Tang for illustration assistance. Support for specimen collection was provided by Mark and Lisa Schwartz and Enid Schwartz. J.J. is supported by a NIH F31 fellowship (1F31-MH117886). M. Saito was supported by a fellowship from the Swiss National Science Foundation. O.O.A. and J.S.G. were supported by funding from McGovern Institute for Brain Research. O.O.A., J.S.G., and F.Z. are supported by the Patrick J. McGovern Foundation and Massachusetts Consortium on Pathogen Readiness (MassCPR) Evergrande COVID-19 Response Fund Award. F.Z. is also supported by the NIH (1R01- MH110049 and 1DP1-HL141201 grants); Mathers Foundation; the Howard Hughes Medical Institute; Open Philanthropy Project; J. and P. Poitras; and R. Metcalfe.

## **Author contributions**

J.J., A.L., J.S.G., O.O.A., and F.Z. conceived the study and designed experiments. J.J., A.L., J.S.G., and O.O.A. performed most of the experiments and analyzed data. M. Saito and M. Segel purified protein and prepared reagents for collaborators. N.K. performed patient sample validation experiments and dilution series at the University of Washington under the supervision of A.L.G. and K.R.J.. A.E.W. and D.T.H. collected positive patient AN swabs. R.P.J.B. and A.R. performed image quantification and developed the mobile application. R.K.M. assisted with IRB application, sample procurement, collaboration coordination. G.F. performed the conservation analysis. E.I.I. and R.N.K. purified guide RNAs. N.K., R.B., M.W.H., X.G.Y., J.Z.L., B.D.W., A.L.G., and K.R.J. provided patient samples. J.J., A.L., J.S.G., O.O.A., and F.Z. wrote the manuscript with help from all authors.

## **Ethical Statement**

This study was performed under the MIT IRB 2005000151, the University of Washington IRB STUDY00010205, and Partners Healthcare IRB 2020P000804.

## **Declaration of conflicts of interest**

F.Z., O.O.A., J.S.G., J.J., and A.L. are inventors on patent applications related to this technology filed by the Broad Institute, with the specific aim of ensuring this technology can be made freely, widely, and rapidly available for research and deployment. O.O.A., J.S.G., and F.Z. are co-founders, scientific advisors, and hold equity interests in Sherlock Biosciences, Inc. F.Z. is also a co-founder of Editas Medicine, Beam Therapeutics, Pairwise Plants, and Arbor Biotechnologies.



## References

1. Kellner MJ, Koob JG, Gootenberg JS, Abudayyeh OO, Zhang F. SHERLOCK: nucleic acid detection with CRISPR nucleases. *Nat Protoc* 2019;14:2986-3012.
